# Supplementary material for: Impact of Soil Heavy Metal Pollution on Food Safety in China
Source: PLoS One. 2015 Aug 7;10(8):e0135182. doi: 10.1371/journal.pone.0135182 (PMC4529268; doi:10.1371/journal.pone.0135182)
Supplement: S1 Table — (XLSX) [file pone.0135182.s001.xlsx]

## Sheet: Sheet1
Study records	Province	Potential sources	Number of soil samples	Cu	Pb	Zn	Cd	As	Ni	Cr	Hg	References
1	Zhejiang	Remote area	8	0	0		0	0		0	0	Ding N 2008: Major agricultural products and environmental heavy metal pollution survey and evaluation in Cangnan county, Zhejiang University
2	Sichuan		26	0	0	0	0	0	0	0	0	Ouyang C, Cui D, Chen H (2009): In mianyang, 108 national highway and Wei Liuhe to Wei Cheng research on the effects of soil heavy metal accumulation. Geophysical computing technology 31, 621-627
3	Jiangsu	Remote area	294	0	0		0	0		0	0	Xinghua cultivated land quality monitoring technical report for 2011
4	Shaanxi	Remote area	63		0		0	0		0	0	Cui X (2009): Soil Environmental Quality Assessment for Agricultural Producing Area Based on Three Standards——A Case in Lingchuan County,Shanxi Province. Journal of Hebei Agricultural Sciences 13, 93-95
5	Anhui		9	0	0	0	0		0	0		Tang W, Ao L, Zhang H, Shan B (2014): Accumulation and risk of heavy metals in relation to agricultural intensification in the river sediments of agricultural regions. Environmental Earth Sciences 71, 3945-3951
6	Beijing	Urban	137	3			3.4					Zhang H, Li H, Wang Z, Zhou L (2011b): Accumulation characteristics of copper and cadmium in greenhouse vegetable soils in Tongzhou District of Beijing. Procedia Environmental Sciences 10, 289-294
7	Hunan	Pb/zn	146				57.5					Du Y, Hu X-F, Wu X-H, Shu Y, Jiang Y, Yan X-J (2013): Affects of mining activities on Cd pollution to the paddy soils and rice grain in Hunan province, Central South China. Environmental monitoring and assessment 185, 9843-9856
8	Shandong	Remote area	149	3.36	0	0	9.4	0	4.03	0	0.67	Liu P, Zhao H-J, Wang L-L, Liu Z-H, Wei J-L, Wang Y-Q, Jiang L-H, Dong L, Zhang Y-F (2011a): Analysis of heavy metal sources for vegetable soils from Shandong Province, China. Agricultural Sciences in China 10, 109-119
9	Anhui	coal	45	0		0		0				Shi GL, Lou LQ, Zhang S, Xia XW, Cai QS (2013): Arsenic, copper, and zinc contamination in soil and wheat during coal mining, with assessment of health risks for the inhabitants of Huaibei, China. Environmental Science and Pollution Research 20, 8435-8445
10	Anhui	coal	30	0		0		3.33333				Shi GL, Lou LQ, Zhang S, Xia XW, Cai QS (2013): Arsenic, copper, and zinc contamination in soil and wheat during coal mining, with assessment of health risks for the inhabitants of Huaibei, China. Environmental Science and Pollution Research 20, 8435-8445
11	Guangzhou	Remote area	227	15.4		8.8	21.1	12.3				Hu Y, Liu X, Bai J, Shih K, Zeng EY, Cheng H (2013): Assessing heavy metal pollution in the surface soils of a region that had undergone three decades of intense industrialization and urbanization. Environmental Science and Pollution Research 20, 6150-6159
12	Hunan	Pb/Zn	6	100		100	100					Zhou H, Zeng M, Zhou X, Liao BH, Liu J, Lei M, Zhong QY, Zeng H (2013): Assessment of heavy metal contamination and bioaccumulation in soybean plants from mining and smelting areas of southern Hunan Province, China. Environmental Toxicology and Chemistry 32, 2719-2727
12	Hunan	Pb/Zn	4	100		100	100					Zhou H, Zeng M, Zhou X, Liao BH, Liu J, Lei M, Zhong QY, Zeng H (2014): Assessment of heavy metal contamination and bioaccumulation in soybean plants from mining and smelting areas of southern Hunan Province, China. Environmental Toxicology and Chemistry_x0000__x0005__x0000_Ȯ_x0000_Ȯ_x0000_ _x0000_ _x0000_Ȯ_x0000_
12	Hunan	Pb/Zn	4	100		100	100					Zhou H, Zeng M, Zhou X, Liao BH, Liu J, Lei M, Zhong QY, Zeng H (2015): Assessment of heavy metal contamination and bioaccumulation in soybean plants from mining and smelting areas of southern Hunan Province, China. Environmental Toxicology and Chemistry_x0000__x0005__x0000_Ȯ_x0000_Ȯ_x0000_ _x0000_ _x0000_Ȯ_x0000_
12	Hunan	Pb/Zn	6	100		100	100					Zhou H, Zeng M, Zhou X, Liao BH, Liu J, Lei M, Zhong QY, Zeng H (2016): Assessment of heavy metal contamination and bioaccumulation in soybean plants from mining and smelting areas of southern Hunan Province, China. Environmental Toxicology and Chemistry_x0000__x0005__x0000_Ȯ_x0000_Ȯ_x0000_ _x0000_ _x0000_Ȯ_x0000_
13	Anhui	Cu ore	44		0		84					Xu D, Zhou P, Zhan J, Gao Y, Dou C, Sun Q (2013): Assessment of trace metal bioavailability in garden soils and health risks via consumption of vegetables in the vicinity of Tongling mining area, China. Ecotoxicology and environmental safety 90, 103-111
14	Hunan	wastewater irrigation	99	1	0	19.2	95	8.1	1	0	26.3	Zhong L, Liu L, Yang J (2012): Characterization of heavy metal pollution in the paddy soils of Xiangyin County, Dongting lake drainage basin, central south China. Environmental Earth Sciences 67, 2261-2268
15	Zhejiang	Remote area	450	1.55556	0	4.44444	8			0		Liu X, Wu J, Xu J (2006): Characterizing the risk assessment of heavy metals and sampling uncertainty analysis in paddy field by geostatistics and GIS. Environmental Pollution 141, 257-264
16	Liaoning	Remote area	20	85	70	95	100					Li F, Fan Z, Xiao P, Oh K, Ma X, Hou W (2009a): Contamination, chemical speciation and vertical distribution of heavy metals in soils of an old and large industrial zone in Northeast China. Environmental geology 57, 1815-1823
17	Guangdong	petrochemical complex	20	28		30	22	0			52	Li J, Lu Y, Yin W, Gan H, Zhang C, Deng X, Lian J (2009b): Distribution of heavy metals in agricultural soils near a petrochemical complex in Guangzhou, China. Environmental monitoring and assessment 153, 365-75
18	Jilin	remote area	216	0	0	0	0	0	0	0	0	Meng X 2008: Under the GIS support of jilin black soil heavy metal pollution evaluation research [D],
19	Zhejiang	Remote area	96	14.58	0	5.21	27.08		6.25			Zhao K, Liu X, Xu J, Selim H (2010): Heavy metal contaminations in a soil–rice system: identification of spatial dependence in relation to soil properties of paddy fields. Journal of hazardous materials 181, 778-787
20	Shandong	Remote area	86	0	0	0	0	0	0	0	0	Jia L, Wang W, Li Y, Yang L (2010): Heavy metals in soil and crops of an intensively farmed area: a case study in Yucheng City, Shandong Province, China. International journal of environmental research and public health 7, 395-412
21	Zhejiang	Remote area	286	11.89	0.35	11.58	24.01		2.71			Zhang X, Lin F, Wong MT, Feng X, Wang K (2009): Identification of soil heavy metal sources from anthropogenic activities and pollution assessment of Fuyang County, China. Environmental monitoring and assessment 154, 439-449
22	Changchun		114	0	0	0			0	0		Sun C, Liu J, Wang Y, Sun L, Yu H (2013): Multivariate and geostatistical analyses of the spatial distribution and sources of heavy metals in agricultural soil in Dehui, Northeast China. Chemosphere 92, 517-523
23	Xinjiang		469									Mamat Z, Yimit H, Ji RZA, Eziz M (2014): Source identification and hazardous risk delineation of heavy metal contamination in Yanqi basin, northwest China. Science of The Total Environment 493, 1098-1111
24	Zhejiang	Remote area	665	0	0		5.41353	0		0	6.61654	Shi J, Wang H, Xu J, Wu J, Liu X, Zhu H, Yu C (2006): Spatial distribution of heavy metals in soils: a case study of Changxing, China. Environmental Geology 52, 1-10
25	Guizhou	Coal	18	0	0	0	77.7778					Tian L, Wu H (2013): TCLP method to evaluate risk of the mining area ecological environment of soil heavy metals. Guizhou agricultural science, 123-127
26	Anhui	remote area	6	33.3333	0		33.3333	0	33.3333		0	Fang C, Liu X, Zhou A (2005): Determination Contents of Heavy Metal and Pesticide Residue of Paeonia ossii and Plantation Soil from Different Habitat in Anhui Province. RESEARCH AND PRACTICE OF CHINESE MEDICINES 19, 17-20
27	Anhui	remote area	51	0	0		3.92					Ma F, Zhang R (2013): Anhui tea garden soil heavy metals. Anhui agriculture notified, 111-113
28	Anhui	Remote area	45	0	0	0	0	0	0	0	0	Li T, Li D, Cao Y, Zhang Q, Zhang X, Zu C, Tang J, Xu J, Wu X, Ling B (2011): Assessments on Pollution Degree and Risk of Tobacco Soils in Chizhou City, Anhui Province. Soils 43, 674-676
29	Anhui	Remote area	30	0	0	0			0	0		Xu H, Chang J (2008): Evaluation and Methods of Heavy Metal Pollution in Main Soils of Anhui Province. Chinese Journal of Soil Science 39, 411-415
29	Anhui	Remote area	24	4.16667	0	8.33333			0	0		Xu H, Chang J (2008): Evaluation and Methods of Heavy Metal Pollution in Main Soils of Anhui Province. Chinese Journal of Soil Science 39, 411-415
29	Anhui	Remote area	25	4	0	40			0	0		Xu H, Chang J (2008): Evaluation and Methods of Heavy Metal Pollution in Main Soils of Anhui Province. Chinese Journal of Soil Science 39, 411-415
29	Anhui	Remote area	15	13.3333	0	0	100		100	0		Xu H, Chang J (2008): Evaluation and Methods of Heavy Metal Pollution in Main Soils of Anhui Province. Chinese Journal of Soil Science 39, 411-415
30	Anhui	Remote area	28	6.8	0	0	20	0	6.8	0	0
31	Anhui	remote area	174								13.9	Chen W, Fang F, Yu J, Zhang Z, Yang D (2009): Environmental Pollution Assessment of Soil Hg and Influence Factors in Wuhu, Anhui Province. JOURNAL OF ANHUI NORMAL UNIVERSITY(NATURAL SCIENCE） 32, 168-172
32	Guizhou		20	0	0	0	0				0	Zhang Y, Cheng J, Li L, Zhao r, Liu H (2014b): Anshun city coal mining area the occurrence characteristics of the vegetable garden soil heavy metal concentration in research. 5-9
33	Liaoning	Irrigation	15	0	0		40	0		0	3.3	Zhang N (2005): Song three sewage irrigation area of soil heavy metal pollution evaluation Agro-Environment and Development 22, 41-44
34	Sichuan		344		0	11						Li L, Chen W (2014): Bazhong soil heavy metal Cd, Pb pollution evaluation. Journal of henan normal university: natural science, 91-95
35	Hebei	Irrigation	23	0	0	0	0			0	0	Zhang H 2010a: Irrigation soil nutrient and space-time distribution of heavy metals research in Baiyangdian upstream slop., Hebei Agricultural University
36	Guizhou	Pb/zn	8		0		37.5	12.5		0	37.5	Tong X, Yang Y, Liu H (2011): Study on Potential Ecological Risk and Environmental Capacity of Heavy Metal in Soil nearby Baili Rhododendron Mining Areas. JOURNAL OF ANHUI AGRICULTURAL SCIENCES 39, 2146-2148
37	Anhui		42	0	0		0	0		0	0	Su W (2014): Bengbu soil environment quality present situation analysis. Modern agricultural science and technology, 238-239
38	Anhui		30			0			6.67			Su W (2014): Bengbu soil environment quality present situation analysis. Modern agricultural science and technology, 238-239
39	Shaanxi	Power plant	34	0	0	0			0	0		Li X, Lu X, Ren C, Chen C, Wang L, Luo D (2012): Characteristics and evaluation of heavy metal pollution in soil of farmland around Baoji Second Power Plant. Agricultural Research In The Arid Areas 30, 220-224,254
40	Shaanxi	Pb/Zn	11	0	0	0	100		100	0		Zhang L 2011: Baoji dongling lead and zinc smelter plant and the surrounding areas of soil heavy metal content in the research, Shaanxi normal university.
41	Jiangsu	Remote area	7	0	0	100	42.8571	0	0	0	0	Li L (2006a): Investigation on HeavyM etals Pollution in Soil in Baoying County. POLLUT ION CONTROL TECHNOLOGY, 46-47
42	Hebei	Urban	26	3.84615	0	19.2308	7.69231		0	0		Liu Y 2011: Baoding suburban sewage irrigation area of soil heavy metal space-time distribution and potential ecological risk assessment. master Thesis, Hebei Agricultural University
43	Gansu	Remote area	131	0	0	0	0.740458	0	0	0		Li S 2011: The northern facility vegetable accumulation characteristics of heavy metals and the prevention and control countermeasures, The Chinese academy of agricultural sciences
43	Henan	Remote area	82	0	0	0	6.1	0	0	0		Li S 2011: The northern facility vegetable accumulation characteristics of heavy metals and the prevention and control countermeasures, The Chinese academy of agricultural sciences
43	Shandong	Remote area	62	0	0	1.6	27.4	0	1.6	0		Li S 2011: The northern facility vegetable accumulation characteristics of heavy metals and the prevention and control countermeasures, The Chinese academy of agricultural sciences
43	Jilin	Remote area	83	0	0	0	39.8	0	0	0		Li S 2011: The northern facility vegetable accumulation characteristics of heavy metals and the prevention and control countermeasures, The Chinese academy of agricultural sciences
44	Beijing	Remote area	70	0	0	0	1.42857	0	0	0	0	Hu K, Zhang F, Lv Y, Wang R, Xu Y (2004): Spatial distribution of concentrations of soil heavy metals in Daxing county, Beijing. ACTA SCIENTIAE CIRCUMSTANTIAE 24, 463-468
45	Beijing		412	0	0	0	0	0		0	0	Han P, Wang J, Lu A, MA Z, PAn L (2012): Distribution and Environment Quality Evaluation of Heavy Metals in Soil in Shunyi of Beijing, China. Journal of Agro-Environment Science 31, 106-112
46	Yunnan	Pb/Zn	39		30.77	56.41	100	0.38				Zhao J, Yang H (2012): Pi river basin in farmland soil heavy metal pollution characters and reason analysis. Anhui agricultural science 40, 7569-7573
47	Shandong	remote area	200		0		0.2					Li Q, Li Q, Zhang W, Zhao M, Wang G, Wu H (2013a): Cangzhou farmland investigation of heavy metals in soil and crops. Environmental and health magazine 30, 758-758
48	Jiangxi	remote area	1	0			0	0		0	0	Li W, Guo Q, Zhang S, Hu B, Li X (2005): Grass coral GAP base of ecological environmental quality assessment. Modern Chinese medicine research and practice 19, 13-14
49	Yunnan	Irrigation	27	0	0	0	0	0			18.5	Bo J, Bo Y (2013): Chang zhengning county small red field evaluation of small watershed slope to the physical and chemical characters. Southern agriculture, 8-10
50	Sichuan	Remote area	197	3.5533	0.507614	0	8.62944	0.507614		1.01523	6.09137	Wang C 2005: Chengdu plain urbanized soil heavy metal evolution (class) and the environment effect research [D], southwest agricultural university
51	Sichuan	Remote area	35		0							Yang G, Ye X, You Q, Wu J (2013): Chengdu plain in farmland soil lead accumulation characteristics and potential ecological harm. 246-249
51	Sichuan	Remote area	37		0							Yang G, Ye X, You Q, Wu J (2013): Chengdu plain in farmland soil lead accumulation characteristics and potential ecological harm. 246-250
51	Sichuan	Remote area	30		0							Yang G, Ye X, You Q, Wu J (2013): Chengdu plain in farmland soil lead accumulation characteristics and potential ecological harm. 246-251
51	Sichuan	Remote area	32		0							Yang G, Ye X, You Q, Wu J (2013): Chengdu plain in farmland soil lead accumulation characteristics and potential ecological harm. 246-252
51	Sichuan	Remote area	34		0							Yang G, Ye X, You Q, Wu J (2013): Chengdu plain in farmland soil lead accumulation characteristics and potential ecological harm. 246-253
51	Sichuan	Remote area	30		0							Yang G, Ye X, You Q, Wu J (2013): Chengdu plain in farmland soil lead accumulation characteristics and potential ecological harm. 246-254
51	Sichuan	Remote area	28		0							Yang G, Ye X, You Q, Wu J (2013): Chengdu plain in farmland soil lead accumulation characteristics and potential ecological harm. 246-255
51	Sichuan	Remote area	30		0							Yang G, Ye X, You Q, Wu J (2013): Chengdu plain in farmland soil lead accumulation characteristics and potential ecological harm. 246-256
51	Sichuan	Remote area	28		0							Yang G, Ye X, You Q, Wu J (2013): Chengdu plain in farmland soil lead accumulation characteristics and potential ecological harm. 246-257
51	Sichuan	Remote area	25		0							Yang G, Ye X, You Q, Wu J (2013): Chengdu plain in farmland soil lead accumulation characteristics and potential ecological harm. 246-258
52	Sichuan	urban	8	0	0	0	0		25	0		Xiang Z (2013): Assessment of Heavy Medal Pollution in Soil at Vegetable Bases in Suburban Area of Chengdu City :Taking Two Vegetable Bases for Example. Modern Agricultural Science and Technology, 212-214
53	Sichuan	Remote area	42	0	0	0	0.77	0	0	0	0
54	Hebei	Remote area	72	0	0	0	1.4	0	0	0	0	LI B, Wang H (2012): Chengde city soil pollution condition investigation. Modern agricultural science and technology, 279-280
55	Hubei	Urban	30	0	0	0	0	0	0			Tian Y, Cheng S, Zhou J, Qin Q, Chen F (2005): Contents and Affecting Factors of Heavy Metals of Vegetable Plantation Soil in the Suburbs of Several Cities in Jianghan Plain. Hubei Agricultural Sciences, 66-70
56	Hunan	Urban	114	18	0	3	43	0		0	99	Zou L 2009: Edge of the city zone soil polluted by heavy metal elements of space mutation characteristics research and evaluation
57	Henan		19	0	0	0		0	0	0		Yuan S, Yan H (2014): Suburban farmland soil heavy metal content in the process of urbanization and its distribution characteristics. Guizhou agricultural science 42, 197-201
58	Guangdong	Urban	30	10	0	6.7	6.7	6.7	13	0	0	Wu K, Huang M, Jin Z, Du L, Liu X, Luo X, Chen Y (2011b): Investigation on the pollution statns and sources of heavy metals in vegetable base soils in the process of urbanization——A case study of Shenzhen city. Soils and Fertilizers Sciences in China, 83-89
59	Hunan	Urban	30	0	0		61.07	9.08		0	8.77	Xiao X, Peng K, Zhou M (2008): Investigation and evaluation of heavy metal pollution in suburban paddy soils—— A case study of Xiangshui Township, Xiangtan City. Chinese Journal of Eco-Agriculture 16, 680-685
60	Anhui	Remote area	13		0		76.9231	0			0	Xu S (2012): Chizhou region along the poisonous and harmful heavy metals research. Modern Agricultural Sciences and Technology, 295-296
61	Sichuan	稀土	64		47		100	0			66	Luo H, Liu W, Chen W, Li Z (2014): Assessment of Heavy Metal Contamination of Soils in a Rare Earth Element Mine in Southern Sichuan. Guizhou Agricultural Sciences 42, 145-148
62	Sichuan	remote area	325					0			0	Xu X, Zhang S, Li D, Li T, Li Y, Tang M (2010): Spatial Variability Characteristics and Influencing Factors of Soil Arsenic and Mercury in the Typical Hilly Region of Central Sichuan,China. JOURNAL OF AGRO-ENVIRONMENT SCIENCE 29, 1320-1325
63	Zhejiang		150	1.4	0		4.7	0		0	2	Shen Q, Jiang K, Lu H, Hu Y, Weng Y, Su T, Ma J (2013): Cixi city the main vegetable production areas of soil heavy metal pollution survey and evaluation. Journal of zhejiang agricultural 25, 0-155
64	Yunnan	Remote area	24		0		0	0			0	Zhou N, Xiao G, Guo D, Zhang D, Yang Q, Liang X (2014a): Dali city flower dam medicinal herbs cultivation base soil and the status of the heavy metal content in Chinese medicinal materials and evaluation. ENVIRONMENTAL CHEMISTRY 2, 029
65	Shaanxi	Remote area	57	5.40541	0	0	5.40541					Hu M (2014): Distribution characteristics and pollution assessment for the farmland soil heavy metals in Dali county. Journal of Arid Land Resources and Environment 1, 014
66+67	Liaoning	Remote area	90	10.0222	0	1.11111	11.1111	0	10	2.22222	0	Luan J 2012: Jinzhou district of dalian city farmland soil heavy metal pollution evaluation, The Chinese academy of agricultural sciences
68	Shaanxi	Coal	43	4.65	13.95	4.65	16.28	2.33		6.98	90.7	Xu Y, Chen S, Chen H, Yuan H (2007): Study on soil heavy metals pollution in daliuta coal mine area. CHINA MINING MAGAZINE 16, 47-50,54
69	Shanxi	Remote area	71		0		0	0		0	0	Yu T (2012): Shanxi datong county vegetable soil heavy metal content and quality evaluation. Agro-Environment and Development, 88-90
70	Yunnan	Remote area	7	0	0	0	0		0			Xie H, Liu X, Chen T, Liao X, Yan X, Wang L (2009): Concentration and Health Risk of Heavy Metals in Vegetables and Soils in Region Affected by an Ancient Tin Ore. Chinese Journal of Environmental Science 29, 3503-3507
70	Yunnan	Si	12	100	66.7	75	100		50			Xie H, Liu X, Chen T, Liao X, Yan X, Wang L (2009): Concentration and Health Risk of Heavy Metals in Vegetables and Soils in Region Affected by an Ancient Tin Ore. Chinese Journal of Environmental Science 29, 3503-3507
71	Beijing	Zn	7								77.7778	Liu F, Wang S, Wu Q, Lin H (2013a): Evaluation and Source Analysis of the Mercury Pollution in Soils and Vegetables Around a Large-scale Zinc Smelting Plant. Chinese Journal of Environmental Science 34, 712-717
72	Liaoning	remote area	5	0	0		0	0		0	0	Zhao H, Wu H, Sun Y (2003): Main pollution factor in the soil characteristics and correlation analysis in Dandong city Liaoning urban and rural environmental science and technology 6, 014
72	Liaoning	remote area	3	0	0		0	0		0	0	Zhao H, Wu H, Sun Y (2003): Main pollution factor in the soil characteristics and correlation analysis in Dandong city Liaoning urban and rural environmental science and technology 6, 014
72	Liaoning	remote area	5	0	0		0	0		0	0	Zhao H, Wu H, Sun Y (2003): Main pollution factor in the soil characteristics and correlation analysis in Dandong city Liaoning urban and rural environmental science and technology 6, 015
72	Liaoning	remote area	3	0	0		0	0		0	0	Zhao H, Wu H, Sun Y (2003): Main pollution factor in the soil characteristics and correlation analysis in Dandong city Liaoning urban and rural environmental science and technology 6, 016
72	Liaoning	remote area	3	0	0		0	0		0	11.1	Zhao H, Wu H, Sun Y (2003): Main pollution factor in the soil characteristics and correlation analysis in Dandong city Liaoning urban and rural environmental science and technology 6, 014
72	Liaoning	remote area	5	0	0		0	0		0	13.3	Zhao H, Wu H, Sun Y (2003): Main pollution factor in the soil characteristics and correlation analysis in Dandong city Liaoning urban and rural environmental science and technology 6, 014
73	Henan	Irrigation	18					0			0	She J, Wu L, Zhao T, Zhang K (2013): Danjiangkou reservoir xichuan submerged area the occurrence characteristics of mercury and arsenic in the soil and the ecological risk assessment. Agricultural journal of environmental science, 111-117
73	Henan	Irrigation	2					0			0	She J, Wu L, Zhao T, Zhang K (2013): Danjiangkou reservoir xichuan submerged area the occurrence characteristics of mercury and arsenic in the soil and the ecological risk assessment. Agricultural journal of environmental science, 111-117
74	Guizhou	remote area	20		0		0	0		0	0	Han F, Li Q, Yan F, Li T, Chen R (2007): The true county pollution-free vegetable producing area environmental quality assessment. Guizhou Agricultural Sciences 35, 95-97
75	Jilin	wastewater irrigation	69	0	0	0	0	0	0		0	Zhu L, Yan B, Wang L (2010): Quantitative characteristics and source analysis of heavy metals in paddy soils in downstream of the Second Songhua River, Jilin Province. CHINESE JOURNAL OF APPLIED ECOLOGY 21, 2965-2970
76	Yunnan	Remote area	146	2.03	0		0	1.35		15.57	0	Zhang G, Guo J, Wang D, Bi S, Zhou X, Ma Z (2013): Cultivated Land Soil Environment Quality Analysis and E valuation in Longchuan County, Yunnan Province, China. Agro-Environment and Development 30, 31-35
77	Jiangxi	Cu	16	68.75	0	0	100		0	0		Wang Z, Xie X (2010): Typical copper tailings surrounding the compound pollution of heavy metals in soil characteristics. 19, 113-117
78	Sichuan	Remote area	29	6.89655	0	0	13.7931					Zhang Y, Zhang S Distribution and Evaluation of Heavy Metals of Agricultural Soil in Typical Earthquake Disaster Area. JOURNAL OF SICHUAN AGRICULTURAL UNIVERSITY
79	Henan	Remote area	6	0	0	0	100	100		0	0	Yu Y, Hu L, Yang Y, Che F, Sun P, Deng F (2010): Pollution Characteristics and Ecological Risk Assessment of Heavy Metals in Farmland Soils of a Typical Basin. RESEARCH OF ENVIRONMENTAL SCIENCES 23, 1523-1527
80	Anhui		162	0	0	0		0		0		Xu J 2014: A typical agricultural area soil - crop systems of heavy metal pollution and health risk assessment, Hefei university of technology
81	Guangdong		61	0	0	0			0	0		Dou L, Ma J, You Y, Cai L (2008): Distribution and Correlation of Heavy Metals in Soil-Vegetable System of Typical Township-Enterprise Dense Area. Soils 40, 812-818
81	Guangdong	Remote area	61	0	0	0			0	0		Dou L, Ma J, You Y, Cai L (2008): Distribution and Correlation of Heavy Metals in Soil-Vegetable System of Typical Township-Enterprise Dense Area. Soils 40, 812-818
82	Chongqing		19	0	0		0	0		0	0	Zhou X, Ran L, Li H (2014b): Mat jiang peony producing the analysis and evaluation of soil heavy metal content. Journal of chongqing college of liberal arts 33, 70-74
83	Jilin	Remote area	20								0	Cao H, Wang J, Zhang X (2006): Influencing Factors and Hg Concentration in Black Soil and Maize in Northeast China. System Sciemces and Comprehensive Studies In Agriculture 22, 292-295
84	Heilongjiang	Remote area	450		0		0.32	0	0.45	0	0.12	Wang S, Sun B, Wang C, Pei Z, Li S, Zuo X, Zhang x, Liu J (2013): Appraisal and Analysis of Soil Heavy Metal Pollution of Typical Black Soil Region in the Northeast of China. Journal of Anhui Agricultural Sciences 41, 4350-4352
85+86	Guangdong		218	3.4	0	0	32.0618	1.83303	5.9	0	23.4145	Cai L, Ma J, Zhou Y, Huang L, Chen F, Xie X, Yang X (2008): Heavy Metal Concentrations of Agricultural Soils and Vegetables from Dongguan,Guangdong Province,China. ACTA GEOGRAPHICA SINICA 63, 994-1003
87	Hunan	Remote area	40	17.5	20		5	0		0	5	Zhou X, Qin P, Li X, Zeng J (2007): Preliminary evaluation of dongting lake plain farmland environment quality. Environmental science and technology 30, 55-56
88	Sichuan	Cement	64	62.5	0	0	50			0		Yang K, Xiong W, Luo Y, Yang L, Zhang L (2011): Analysis and Assessment on Pollution Condition of Heavy Metals in Soil in the Farmland Around Dujiangyan City. Environmental Monitoring in China, 10-16
89	Gansu	Remote area	1		0			0		0	0	Li X, Xu M, Wang X (2006b): Seven pollution-free vegetables origin certification county in gansu province (city) the assessment of soil heavy metal content. Gansu agricultural science and technology, 36-37
89	Gansu	Remote area	1		0			0		0	0	Li X, Xu M, Wang X (2006b): Seven pollution-free vegetables origin certification county in gansu province (city) the assessment of soil heavy metal content. Gansu agricultural science and technology, 36-38
89	Gansu	Remote area	1		0			0		0	0	Li X, Xu M, Wang X (2006b): Seven pollution-free vegetables origin certification county in gansu province (city) the assessment of soil heavy metal content. Gansu agricultural science and technology, 36-39
89	Gansu	Remote area	1		0			0		0	0	Li X, Xu M, Wang X (2006b): Seven pollution-free vegetables origin certification county in gansu province (city) the assessment of soil heavy metal content. Gansu agricultural science and technology, 36-40
89	Gansu	Remote area	1		0			0		0	0	Li X, Xu M, Wang X (2006b): Seven pollution-free vegetables origin certification county in gansu province (city) the assessment of soil heavy metal content. Gansu agricultural science and technology, 36-41
89	Gansu	Remote area	1		0			0		0	0	Li X, Xu M, Wang X (2006b): Seven pollution-free vegetables origin certification county in gansu province (city) the assessment of soil heavy metal content. Gansu agricultural science and technology, 36-42
89	Gansu	Remote area	1		0			0		0	0	Li X, Xu M, Wang X (2006b): Seven pollution-free vegetables origin certification county in gansu province (city) the assessment of soil heavy metal content. Gansu agricultural science and technology, 36-43
89	Gansu	Remote area	1		0			0		0	0	Li X, Xu M, Wang X (2006b): Seven pollution-free vegetables origin certification county in gansu province (city) the assessment of soil heavy metal content. Gansu agricultural science and technology, 36-44
90	Hubei	remote area	66	0	0		0	0		0	0	Xiong H, Lu J, Li Q, Zhan S, Liao Q, Wu Q (2008): THE SOIL HEAVY METAL POLLUTION ASSESSMENT OF VEGETABLE LAND OF E ZHOU CITY. INNER MONGOLIA ENVIRONMENTAL SCIENCES 20, 36-39
91	Shandong	Urban	15	0	0	0	60	0		0	20	Wang M, Yang Z, Bing A, Qian F, Zhang L (2010): The investigation on pollution of heavy metals in the soil in Xudong area of Feicheng City. JOURNAL OF TAISHAN MEDICAL COLLEGE 31, 48-50
92	Shanxi		34	0	0	0	0	1	5	0	0	Dong M, Gao Y, Zhang Y (2014): Fenhe linfen section of sewage irrigation area of soil heavy metal pollution evaluation. Henan agricultural science 43, 72-78
93	Shanxi		100	0	0	0	0	1	5	0	0	Dong M, Gao Y, Zhang Y (2014): Fenhe linfen section of sewage irrigation area of soil heavy metal pollution evaluation. Henan agricultural science 43, 72-78
94	Shanxi	Remote area	95	0	0	0			0	0		Shi W 2011: Risk Assessment & Spatial Distribution of Soil Nutrients and Heavy Metal in Fenhe Reservoir Surrounding.
95	Guangdong	Urban	33	6.1		12.1	57.5	12.1	9.1		81.8	Wen Y 2005: Foshan city garden soil and vegetables heavy metal pollution status and governance, Hunan agricultural university,
96	Guangdong	Urban	38		0		12.24			0	93.88	Li M, Wu Q, Li R, Nie C, Liang J, Ouyang F, Chen C (2009b): The Investigation and Evaluation of Heavy Metal Pollution in Wastewater Irrigated Soils and Vegetables in the Suburb of Foshan. JOURNAL OF SOUTH CHINA AGRICULTURAL UNIVERSITY 30, 19-21
97	Fujian	Urban	3					0				Tu J, Wu Y, Chen W, Luo Q, Yao S (2011): Fujian several vegetable field analysis of arsenic content in soil and vegetables. Journal of fujian agriculture 26, 1065-1068
97	Fujian	Remote area	2					0				Tu J, Wu Y, Chen W, Luo Q, Yao S (2011): Fujian several vegetable field analysis of arsenic content in soil and vegetables. Journal of fujian agriculture 26, 1065-1068
97	Fujian	remote area	4					0				Tu J, Wu Y, Chen W, Luo Q, Yao S (2011): Fujian several vegetable field analysis of arsenic content in soil and vegetables. Journal of fujian agriculture 26, 1065-1068
97	Fujian	Remote area	1					0				Tu J, Wu Y, Chen W, Luo Q, Yao S (2011): Fujian several vegetable field analysis of arsenic content in soil and vegetables. Journal of fujian agriculture 26, 1065-1069
97	Fujian	Remote area	7					0				Tu J, Wu Y, Chen W, Luo Q, Yao S (2011): Fujian several vegetable field analysis of arsenic content in soil and vegetables. Journal of fujian agriculture 26, 1065-1070
98	Fujian	Urban	8		0	0	0	0		0	0	Xu J, Chen Y, Zou H (2011b): Regional Comparisons for Heavy Metal Contamination in Soil and Vegetables in Fujian Province. Fujian Journal of Agricultural Sciences 26, 646-651
98	Fujian	Urban	8		0	0	0	0		0	12.5	Xu J, Chen Y, Zou H (2011b): Regional Comparisons for Heavy Metal Contamination in Soil and Vegetables in Fujian Province. Fujian Journal of Agricultural Sciences 26, 646-651
98	Fujian	Urban	8		0	0	12.5	0		0	37.5	Xu J, Chen Y, Zou H (2011): Regional Comparisons for Heavy Metal Contamination in Soil and Vegetables in Fujian Province. Fujian Journal of Agricultural Sciences 26, 646-651
98	Fujian	Urban	8		0	0	50	0		0	62.5	Xu J, Chen Y, Zou H (2011): Regional Comparisons for Heavy Metal Contamination in Soil and Vegetables in Fujian Province. Fujian Journal of Agricultural Sciences 26, 646-651
99	Fujian	Remote area	327	2.75229	0	0.611621	5.19878	0.30581	2.44648	0.30581	12.5	Zheng H (2012): Heavy Metal Pollution and Potential Ecological Risks of Soils for Agricultural Cultivations in Fujian. Fujian Journal of Agricultural Sciences 27, 888-894
100	Fujian		46		15.2174		0	0		0	28.2609	Chen J (2014): Fujian longyan xinluo district of cultivated land quality evaluation and improvement. Fujian hot-work technology 39, 18-21
101	Fujian	Remote area	150		0		0	2.7		1.4	0.7	Guo y, Wang G, Luo D, Ge H, Wang g, Chen J, Luo Z (2011b): Fujian tieguanyin tea garden soil in the lead, cadmium, arsenic, chromium, mercury, copper, the environmental quality of fluorine present situation analysis. Journal of Chinese ecological agriculture 19, 676-681
102	Fujian	Remote area	195		0		0				58.46	Chen H, Li J, Chen N, Cao X (2013): Fujian Coastal Areas in Different Regions of Paddy Soil Heavy Metal Elements Enrichment Characteristics and Assessment of Environmental Quality. Environmental Monitoring in China, 34-40
103	Fujian	Remote area	187	5.9	0	3.3	12.6	0.540541	0	0	42.7	Chen D, Xie W, Song G (2010): Fujian coastal farmland soil heavy metal pollution and potential risks. Chinese Journal of Soil Science, 194-199
104	Fujian		55		0		0	0		0	0	Lin X (2007): Fujian zhangzhou and vegetable garden soil heavy metal pollution assessment and control. Subtropical plant science 36, 45-47
105	Liaoning	Coal	180	0		0		0	0.56			Xu L, Li Y, Su Q, Wu J, Xiong X, Song B, Zheng G, CHen Y (2007): Contents and spatial distribution patterns of heavy metals in farmland soils of Fuxin City. CHINESE JOURNAL OF APPLIED ECOLOGY 18, 1510-1517
106	Sichuan	Pb/Zn	17	0	100	58.8235	100	5.88235	0	0	11.7647	Tang Y 2008: Ganluo county red ditch lead-zinc mine soil heavy metals and agricultural products health quality research, Sichuan agricultural university,
107	Gansu	Remote area	38		2.39234		35.8852			4.78469		Li Y (2009): Level of heavy metals in the soil and evaluation in Jingyuan, Gansu Gansu province chemical society the twenty-sixth annual meeting and the eighth middle school chemistry teaching experience exchange meeting proceedings
108	Gansu	Remote area	70	0	0		0	0		0	0	Li R, Che Z, Hu M (2006a): Monitoring Survey on Heavy Metals in Soils Growing Traditional Chinese Herbs. Journal of Agro-Environment Science( J. Agro-Environ. Sci.) 25, 523-527
109	Gansu		30		0		0	0		0	0	Jiang J (2014): The soil heavy metal potential ecological risk assessment of pingliang city, gansu province. China's agriculture notified 30, 176-180
109	Gansu		72		0		0	0		0	0	Jiang J (2014): The soil heavy metal potential ecological risk assessment of pingliang city, gansu province. China's agriculture notified 30, 176-181
109	Gansu		34		0		0	0		0	0	Jiang J (2014): The soil heavy metal potential ecological risk assessment of pingliang city, gansu province. China's agriculture notified 30, 176-182
109	Gansu		3		0		0	0		0	0	Jiang J (2014): The soil heavy metal potential ecological risk assessment of pingliang city, gansu province. China's agriculture notified 30, 176-183
109	Gansu		4		0		0	0		0	0	Jiang J (2014): The soil heavy metal potential ecological risk assessment of pingliang city, gansu province. China's agriculture notified 30, 176-184
109	Gansu		4		0		0	0		0	0	Jiang J (2014): The soil heavy metal potential ecological risk assessment of pingliang city, gansu province. China's agriculture notified 30, 176-185
110	Gansu	Remote area	428	0	0	0	0.18	0.58	1.18	0.43	0	Liu W (2013): Zhang ye, gansu province, yongchang area of soil heavy metal element geochemical characteristics. Geophysical and geochemical exploration 37, 883-888
111	Gansu	Remote area	45	0	0		0	0			0	Gu Z, Wang Y, SUn Y (2014): Angelica main production areas in Gansu province comparative analysis of soil heavy metal content. Gansu Science and Technology 30, 114-116
112	Gansu	Remote area	175	0	0		0	0		0	0	Li R, Yu A, Bai B, Wang Q (2013b): Plateau in central gansu open vegetable plantation soil heavy metal pollution and potential ecological risk analysis. Agricultural journal of environmental science, 103-110
113	Jiangxi	W	3	75	50	0	100					Zhang S 2009: Lantian smelter surrounding farmland compound pollution of heavy metals in soil and grain analysis and evaluation, Shaanxi Normal University
113	Jiangxi	W	3	100	0	50	100					Zhang S 2010: Lantian smelter surrounding farmland compound pollution of heavy metals in soil and grain analysis and evaluation, Shaanxi Normal University
113	Jiangxi	W	3	100	0	50	100					Zhang S 2011: Lantian smelter surrounding farmland compound pollution of heavy metals in soil and grain analysis and evaluation, Shaanxi Normal University
113	Jiangxi	W	3	100	50	50	100					Zhang S 2012: Lantian smelter surrounding farmland compound pollution of heavy metals in soil and grain analysis and evaluation, Shaanxi Normal University
114	Guizhou	irrigation	34					100				Liu H, Wu P, Zhang C, Cao Z, Xie H (2010): Characteristics of Arsenic Distributing in Soils Irrigated by High-arsenic Coal Drainage. ENVIRONMENTAL SCIENCE & TECHNOLOGY 8, 016
115	Jiangsu	Remote area	50	0	0		0	0		0	0	Xu J, Bai J, Cheng Q, Xu X, Wu J, Zang S, Tan L (2011a): Analysis and Evaluation of Heavy Metal Control of Vegetable Producing Area in Gaoyou City. Rain Fed Crops, 23-26
116	Gansu	Remote area	32		0		0	0		0	0	Li R, Che Z, Tao H (2010b): Assessment of Environment Quality of Products Bases of Plateau Summer Vegetables. Northern Horticulture, 33-35
116	Gansu	Remote area	5		0		0	0		20	0	Li R, Che Z, Tao H (2010): Assessment of Environment Quality of Products Bases of Plateau Summer Vegetables. Northern Horticulture, 33-35
117	Ningxia	remote area	3	0	0	0	0	0		0	0	Du W, Chen P, Zhang Y, He L (2013): Natural guyuan city agricultural environmental quality monitoring and evaluation. Ningxia agriculture and forestry science and technology, 76-78
117	Ningxia	remote area	3	0	0	0	0	0		0	0	Du W, Chen P, Zhang Y, He L (2013): Natural guyuan city agricultural environmental quality monitoring and evaluation. Ningxia agriculture and forestry science and technology, 76-79
117	Ningxia	remote area	3	0	0	0	0	0		0	0	Du W, Chen P, Zhang Y, He L (2013): Natural guyuan city agricultural environmental quality monitoring and evaluation. Ningxia agriculture and forestry science and technology, 76-80
117	Ningxia	remote area	3	0	0	0	0	0		0	0	Du W, Chen P, Zhang Y, He L (2013): Natural guyuan city agricultural environmental quality monitoring and evaluation. Ningxia agriculture and forestry science and technology, 76-81
118	Shaanxi	Irrigation	4		0		0	0		0		Zheng G (2010): Investigation and Assessment on Heavy Metals Pollution of Agricultural Soil in Guanzhong Irrigation District. Chinese Journal of Soil Science, 473-478
118	Shaanxi	Irrigation	4		0		0	0		0		Zheng G (2010): Investigation and Assessment on Heavy Metals Pollution of Agricultural Soil in Guanzhong Irrigation District. Chinese Journal of Soil Science, 473-479
118	Shaanxi	Irrigation	6		0		0	0		0		Zheng G (2010): Investigation and Assessment on Heavy Metals Pollution of Agricultural Soil in Guanzhong Irrigation District. Chinese Journal of Soil Science, 473-480
119	Sichuan		194	0	0	0	13.4	0	0	0	1.5	Xu Z, Liu D, Xu T, DUan Y, Cui Z, Zhao P (2008): Status and Assessment of Heavy Metal Pollution in Soil of Shiya Town of Guang'an City. ACTA AGRICULTURAE JIANGXI 20, 30-32
120	Guangdong	Remote area	578	10.03	0	0.69	11.07	1.73	22.32	3.81	13.49	Yang G, Zhang T, Wan H, Luo W, Gao Y (2007): Spatial Distribution and Sources of Heavy Metal Pollution of Agricultural Soils in the Typical Areas of Guangdong Province, China. Soils 39, 387-392
121	Guangdong	Remote area	156		0		9.62	0.64		0.64	3.85	Song Q, Fang J, Wang F (2008): Guangdong province is mainly vegetables origin research and assessment on heavy metal content in the soil. The environmental pollution and the prevention and control 30, 91-93
122	Guangdong		62	1.6	0	9.1	21	25.8	11.3	0	6.5	Wang G, Li J, Lu J (2014): Guangdong sugarcane area monitoring and evaluation of soil heavy metal elements. Cane sugar, 54-57
123	Guangxi	Remote area	1574	1.21	0.25	2.48	24.71	3.68	7.31	0.25	8.7	Ling N (2010): Different types of farmland soil heavy metal content in guangxi situation analysis. Environment and development in agriculture 27, 91-94
123	Guangxi	Remote area	336	4.46	0.3	16.67	44.05	22.92	34.23	1.79	12.2	Ling N (2010): Different types of farmland soil heavy metal content in guangxi situation analysis. Environment and development in agriculture 27, 91-94
124	Guangxi	Remote area	50		0		54	2				Huang Y, Chen G, Xiong L, Wang Y, Ye K, Zhang L, Tang Q, Wang J (2013): Survey and Evaluation of Heavy Metal Contamination of Paddy Soil in Guangxi. Journal of Anhui Agricultural Sciences 41, 10648-10649
125	Guangxi	Remote area	148	2.02939	0	2.70189	18.8684	12.1612	27.0868	2.02642	5.40689	Huang W, Teng D, Nie W, Xie S (2007b): Investigation and evaluation on the soil quality of cultivated land in Guangxi. Guangxi Agricultural Sciences 37, 703-706
126	Guangxi	Pb/Ti	339				55.59					Xiang M, Zhang G, Li L, Wei X, Cai Y (2011): The Characteristics of Heavy Metals in Soil Around the Hechi Antimony-Lead Smelter,Guangxi,China. Acta Mineralogica Sinica 31, 250-255
127	Guangdong	Remote area	119					1.68067				Yu G, Wen Y, Xu Z, Dong H, Zhang L, He S, Zhang Y, Liu H (2009): Study of Arsenic Concentrations in Vegetables and Soils in Guangzhou City and the Potential Risk to Human Health. Journal of Soil and Water Conservation, 62-65
128	Guangdong	urban	3								0	Liu X, Xie S, Wei X, Hao X (2011b): Evaluation on the Mercury Pollution of Main Vegetable Producing Areas in Guangzhou City. Hubei Agricultural Sciences 50, 3069-3071
128	Guangdong	urban	13								7.7	Liu X, Xie S, Wei X, Hao X (2011b): Evaluation on the Mercury Pollution of Main Vegetable Producing Areas in Guangzhou City. Hubei Agricultural Sciences 50, 3069-3071
128	Guangdong	urban	7								14.3	Liu X, Xie S, Wei X, Hao X (2011b): Evaluation on the Mercury Pollution of Main Vegetable Producing Areas in Guangzhou City. Hubei Agricultural Sciences 50, 3069-3071
128	Guangdong	urban	6								16.7	Liu X, Xie S, Wei X, Hao X (2011b): Evaluation on the Mercury Pollution of Main Vegetable Producing Areas in Guangzhou City. Hubei Agricultural Sciences 50, 3069-3071
128	Guangdong	urban	6								33.3	Liu X, Xie S, Wei X, Hao X (2011): Evaluation on the Mercury Pollution of Main Vegetable Producing Areas in Guangzhou City. Hubei Agricultural Sciences 50, 3069-3071
128	Guangdong	urban	24								83.3	Liu X, Xie S, Wei X, Hao X (2011): Evaluation on the Mercury Pollution of Main Vegetable Producing Areas in Guangzhou City. Hubei Agricultural Sciences 50, 3069-3071
128	Guangdong	urban	1								100	Liu X, Xie S, Wei X, Hao X (2011): Evaluation on the Mercury Pollution of Main Vegetable Producing Areas in Guangzhou City. Hubei Agricultural Sciences 50, 3069-3071
129	Jiangxi	Cu	6	100	0	0	83.3333	0	0	0	0	Wu S, Zou X, Pan X, Cai W, Luo Y (2013): Analysis and Evaluation on Heavy Metal Pollution Condition of Soil in Farmland around Guixi Smelting Factory. Jiangxi Science 30, 779-783
130	Guizhou市	Remote area	967		0.31		32.26	10.34		0.31	20.99	Deng Q 2005: The present situation of the guiyang city suburban county agricultural soil heavy metal pollution and evaluation. Thesis, Guizhou university
131	Guizhou	Hg	6								100	Liu P, Wu P, Tao X (2005): Variation of Mercury in Soil of a Mercury Mine of Guizhou. ENVIRONMENTAL SCIENCE & TECHNOLOGY 2
132	Guizhou	Ti	12	75	100	83.3333		91.6667			100	Liu L, Long J, Wan H, Li J (2013b): Distribution Characteristics and Risk Assessment of Heavy Metals in Agricultural Soils in An Abandoned Antimony Smelter in Guizhou Karst Areas. Soils 45, 1036-1047
133	Guizhou	Urban	7	0	0	0	57.1429	0		0	42.8571	Fan C, Zhang B, Qin S, Xia P, Lin T (2012): Distribution and Pollution Assessment of Heavy Metals in Sediments and Soils in Maixi River of Guizhou. Hubei Agricultural Sciences 51, 4485-4490
134	Guizhou	Cu	4	100	0	100	75	0			100	Chen X, Zhang C (2010): A copper mine in guizhou four kinds of bryophytes and its heavy metal element analysis matrix. Gold, 48-52
135	Guizhou	Hg	4	100	25		33.33				100	Chen X, Zhang C (2009): Wood - mercury in guizhou area heavy metal elements in four species of moss plants and its matrix analysis. Journal of northwest plants, 2535-2541
136	Guizhou	Sb	5	100	100	100	100	100	100	100		Shan X, Xu S (2011): The Analysis and Assessment on the Pollution Condition of Heavy Metals in the Soil around the Qinglong Dachang Antimony Mining Area in Guizhou Province. Journal of Guizhou University（Natural Science） 28, 132-135
137	Guizhou	Gold	3	67	0	33					100	Jiang H, Zhang Z (2007): Mensuration and correlating analyse of heavy metal elements in three mosses and soil from Lao Wanchang Lateritic Gold Deposit in Qinglong, Guizhou. Guihaia 27, 610-615
138	Guizhou	Remote area	21	0	0		0	0			0	Liu F, Huang X, Qin P, Hu J, Li C, Jiang C (2009a): Evaluation of Heavy Metals Pollution in Soils from Blumea balsamifera Planting Base in Guizhou Province. JOURNAL OF ANHUI AGRICULTURAL SCIENCES 37, 4249-4253
139	Guizhou		10	70	0	70	100	10	70	0		Li C, Li S, Luo Y, Wang X, Zhang J (2014): Luxury township farmland soil environment quality characteristics research in bijie city, Guizhou province. Earth and Environment 2, 016
140	Guizhou	Hg	139								63.3094	Liu H, Zhou J, Zhu H, Feng X, Du B, Long J (2014): Guizhou province in different types of pollution of mercury distribution in the area of agricultural soil, and the evaluation of the pollution. Environmental Chemistry 33, 691-692
141	Guizhou	Hg mining	42								100	Ding Z, Wang W, Zhai L, Tang Q, liu C, Cheng J, Hu W (2004): Mercury Pollution and Its Ecosystem Effects in Wanshan Mercury Miner Area, Guizhou. CHINESE JOURNAL OF ENVIRONMENTAL SCIENCE 25, 111-114
142+143	Guizhou	Remote area	2834				36.8231					Song C, He J, Tan H (2005): Preliminary evaluation of the agricultural soil heavy metal pollution in guizhou. Guizhou Agricultural Sciences 33, 13-16
144	Guizhou	Hg mining	1								100	Ding Z, Wang W, Zhai L, Tang Q, liu C, Cheng J, Hu W (2004): Mercury Pollution and Its Ecosystem Effects in Wanshan Mercury Miner Area, Guizhou. CHINESE JOURNAL OF ENVIRONMENTAL SCIENCE 25, 111-114
144	Guizhou	Hg mining	1								100	Ding Z, Wang W, Zhai L, Tang Q, liu C, Cheng J, Hu W (2004): Mercury Pollution and Its Ecosystem Effects in Wanshan Mercury Miner Area, Guizhou. CHINESE JOURNAL OF ENVIRONMENTAL SCIENCE 25, 111-115
145	Guizhou	Coal	8	100	0	0	12.5	37.5				Shen W, Wu y (2011): XingRen abandoned coal mine in guizhou area of soil heavy metal pollution and soil enzyme activity. Guizhou agricultural science 39, 111-116
146	Guizhou	Coal	6	66.6667	0	16.6667	83.3333					Zhang Y, Du Y, Fu H, Sun B, Chen L (2011): Assessment of heavy metals contamination of soil in Zhijin coal mine area of Guizhou province. Journal of Guizhou Normal University（Natural Sciences） 29, 21-23
146	Guizhou	Coal	9	88.8889	66.6667	22.2222	44.4444					Zhang Y, Du Y, Fu H, Sun B, Chen L (2011): Assessment of heavy metals contamination of soil in Zhijin coal mine area of Guizhou province. Journal of Guizhou Normal University（Natural Sciences） 29, 21-23
146	Guizhou	Coal	21	90.4762	75	28.5714	52.381					Zhang Y, Du Y, Fu H, Sun B, Chen L (2011): Assessment of heavy metals contamination of soil in Zhijin coal mine area of Guizhou province. Journal of Guizhou Normal University（Natural Sciences） 29, 21-23
146	Guizhou	Coal	6	100	33.33	50	33.33					Zhang Y, Du Y, Fu H, Sun B, Chen L (2011): Assessment of heavy metals contamination of soil in Zhijin coal mine area of Guizhou province. Journal of Guizhou Normal University（Natural Sciences） 29, 21-23
147	Guangxi	Pb/Zn	50		0		54	2				Huang Y, Chen G, Xiong L, Wang Y, Ye K, Zhang L, TAng Q, Wang J (2014): Survey and evaluation of heavy metal contamination of paddy soil in western Guangxi. Journal of Southern Agriculture 45
148	Guangxi	Remote area	160					21.9	14.38			Yuan L, Song B, Meng D, Zhong X, Zhang X (2012): A survey of nickel concentrations in vegetables and soils in GuiUn and the potential risks to human health. Environmental Pollution ＆ Control 34, 46-52
149	Guangxi	Urban	118								16.9	Hou M, Qian J, Zhang L (2004): Guilin vegetable field soil - mercury pollution vegetable research and evaluation. The ecological environment 13, 575-577
150	Guangxi	Remote area	159				85.5					Song B, Tang L (2012): A Survey of Cadmium Concentrations in Vegetables and Soils in Guilin and Food Safety Assessment of Vegetables. Journal of Ecology and Rural Environment 28, 238-242
151	Heilongjiang	Urban	95	0	0	0	0		0	0		Zhang L 2012: Research of soil heavy metal pollution in Harbin, 哈尔滨师范大学
152	Hainan	pb/zn	5	100	100	100	100					Lu B, Meng Z, Zhao Z, Yuan J (2013): Changhua lead and zinc mine soil heavy metal content enrichment characteristics and advantages of plant in Hainan. Journal of Henan Science and Technology 1, 151
153	Hainan	remote area	19		0		15.7895	10.5263		5.26316		Xiao Z 2011: Hainan island in the laterite Mn, zinc, Cu, Ni content, distribution and pollution assessment, Hainan normal university.
155+154	Hainan	remote area	591		0	0	1.16846	0		3.20012	0.500034	Geng J, Wang W, Wen C, Yi Z, Tang S (2012): Concentrations and distributions of selenium and heavy metals in Hainan paddy soil and assessment of ecological security. Acta Ecologica Sinica 32, 3477-3486
156	Hainan		16	0	0	0	0	0	0	0	0	ZHang Y, Kuang J, Xie Y, Guo T (2014c): Hainan agricultural origin of soil environmental quality evaluation. Subtropical journal of resources and environment 3, 011
156	Hainan		30	0	0		3.33	0	0	0	3.33	ZHang Y, Kuang J, Xie Y, Guo T (2014c): Hainan agricultural origin of soil environmental quality evaluation. Subtropical journal of resources and environment 3, 011
156	Hainan		36	0	0	0	0	0	8.33	0	0	ZHang Y, Kuang J, Xie Y, Guo T (2014): Hainan agricultural origin of soil environmental quality evaluation. Subtropical journal of resources and environment 3, 011
156	Hainan		35	0	0	0	0	0	17.14	0	0	ZHang Y, Kuang J, Xie Y, Guo T (2014): Hainan agricultural origin of soil environmental quality evaluation. Subtropical journal of resources and environment 3, 011
156	Hainan		45	2.22	0	0	2.22	0	8.89	20	2.22	ZHang Y, Kuang J, Xie Y, Guo T (2014): Hainan agricultural origin of soil environmental quality evaluation. Subtropical journal of resources and environment 3, 011
156	Hainan		34	5.88	0	0	0	0	26.47	8.22	0	ZHang Y, Kuang J, Xie Y, Guo T (2014): Hainan agricultural origin of soil environmental quality evaluation. Subtropical journal of resources and environment 3, 011
157	Hainan	Remote area	19		0		0	0		0	0	Lv L, Guo B, Qi Z (2009): Pollution of Heavy Metals in Paddy Soil in Wanning, Hainan Province. CHINESE JOURNAL OF TROPICAL CROPS 30, 1023-1027
158	Hainan	remote area	25		0		0	0		4	4	Wei Z, Guo B, Qi Z (2009): Hainan wenchang in rice soil heavy metal pollution evaluation. Anhui agricultural science 37, 17616-17619
159	Heilongjiang		7	0	0		0	0		0	0	Duan L, Xu G, Liu T (2014): Han XingTie mining area the evolution characteristics of heavy metals in soil and corn. Horizon of science and technology, 22-22
160	Hebei		117	3.4	0		0	0.85		0	0	Duan L, Xu G, Liu T (2014): Han XingTie mining area the evolution characteristics of heavy metals in soil and corn. Horizon of science and technology, 22-22
161	Sichuan	Remote area	30		67	100	100					Mao Z 2009: Hanyuan lead-zinc mining area soil polluted by heavy metal spatial variation and its risk assessment
162	Neimenggu		24				0	0		0	0	Liu M (2014): Hanggin HouQi farmland environment quality condition analysis. Inner Mongolia agricultural science and technology 2, 024
163	Zhejiang	Urban	83	0	0	0						Li J, Xie Z, Xu J, Ye L, Liu X (2003): Evaluation on environmental quality of heavy metals in vegetable plantation soils in the suburb of Hangzhou. Ecological Environment 12, 277-280
164	Anhui	Urban	271	0	0	0	0	1.47601	1.47601	0	0	Yang H, Xu X, Li C (2008): Research on the Contain of Heavy Metal in Vegetable Planting Land in Daiwei Township of Hefei City and its Environment Situation. JOURNAL OF ANHUI AGRICULTURAL SCIENCES 36, 1122-1123
165	Anhui	Urban	32	0	0	0	0			0		Zhu J, Li G, Zhou H (2009a): The Content and Contamination Assessment of Heavy Metals in Hefei Suburban Garden Soil Modern Agricultural Sciences 97-99
166	Guizhou		15	0	0		0	0			0	Luo W, Lin C, Yang W, Sun C, Liu Y, Zhang Z, Wang F (2014): Fleece-flower root and planting soil heavy metal content characteristics and correlation studies. Hubei province agricultural science 18, 030
167	Hebei	remote area	20029	0.15	0	0.1	0.52	0.03	0.605	0.09	0.04	Guo H, Yang Z, Li H, Ma W, Ren J (2011a): Hebei plain surface soil environmental quality and pollution of heavy metals. China's geological 38, 218-225
168	Hebei	Remote area	100	10	0	5	9	1	0	0	0	Zhang L, Xu H, Yu Q, Li R, Ma Z, Cao F, LI H (2010b): The Investigation and Evaluation of the Heavy Metal Pollution in Farmland Soil and Crop in the QingYuan of Hebei,China. JOURNAL OF AGRO-ENVIRONMENT SCIENCE 29, 2139-2146
169	Hebei		2781	0.04	0	0.4	0.65	0	0	0	0.15	Cui X, Qin Z, Luan W, Song Z (2014): Baoding city, hebei province under the soil heavy metal pollution and potential ecological risk assessment. Modern geology 28, 523-530
170	Hebei	Remote area	150		0		0	0		0	0	Jiang B 2013: Hemp yam producing soil suitability evaluation in hebei province, Hebei agricultural university,
170	Hebei	Remote area	140		0		0	0		0	0	Jiang B 2013: Hemp yam producing soil suitability evaluation in hebei province, Hebei agricultural university,
171	Hebei	Remote area	115	0	0	0	0	0	8.8	8.8	0	Jiang L 2006: Hebei tangshan rich zone distribution of heavy metals in soil and soil quality evaluation, China university of geosciences (Beijing)
172	Hebei	Remote area	295	0	0	0	0	0.338983		0	0	Li Q, Li Q, Zhang W, Zhao M, Wang G, Wu H (2013a): Cangzhou farmland investigation of heavy metals in soil and crops. Environmental and health magazine 30, 758-758
172	Hebei	Remote area	250	0	0	0	0.4	0		0	0	Zhu J 2011: Hebei pear producing green fruit production soil suitability evaluation, Hebei agricultural university,
172	Hebei	Remote area	238	0	0.420168	0.420168	0	0		0	0	Zhu J 2011: Hebei pear producing green fruit production soil suitability evaluation, Hebei agricultural university,
172	Hebei	Remote area	166	10.8434	0.60241	0	1.20482	0		0	0.60241	Zhu J 2011: Hebei pear producing green fruit production soil suitability evaluation, Hebei agricultural university,
173	Henan	113.258	14	0	0	0			0	0		Ma J, Du P, Wang X (2011): Heavy metal concentrations in the soil and health risk estimation via ingesting yam in Huilou yam-growing area, Henan. Journal of Safety and Environment 11, 106-110
174	Henan	Remote area	102	0	0	0	0	0	0	1.96	0	Zheng Y (2007): On Heavy Metal Pollution Status and Its Assessment for the Farmland Soil of Henan Province. Journal of Environmental Management College of China 17, 44-46
175	Henan	remote area	20		0		0					Jin K (2012a): In parts of henan puyang city soil lead, cadmium pollution situation analysis.
176	Henan	Remote area	501	0	0	0	0	0.199601	0	0	0.199601	Xuan Z, Wei T, Zhao Y, Zhao Q (2006): Study on Heavy Metal Pollution of Soil in the Base of Dominant Agricultural Products in Henan Province. JOURNAL OF ANHUI AGRICULTURAL SCIENCES
177	Henan	remote area	100					0	0	0	0	Zhang M, Yao S, Zhang J, Sun X, Li H, Zhu H, Chen C (2009b): Investigation of Mercury Content in Plough Layers of Main Soil Types in Henan Province. Shandong Agricultural Sciences, 93-96
178	Heilongjiang	Remote area	15	0	0		0	0		0	0	Sun J, Hao B, Zhu M, Che W (2010): Comprehensive Assessment of Heavy Metals Pollution in the Soil of Zhangdiyingzi. JOURNAL OF ANHUI AGRICULTURAL SCIENCES 38, 16308-16309,16342
179	Heilongjiang	remote area	115	0	0	0	0					Shi W, Wang J, Bian Z, Wang Q (2005): Distribution and Evaluation of Main Heavy Metals and Available Microelements in Soils in the Northern Area of Heilongjiang Province. CHINESE JOURNAL OF SOIL SCIENCE 36, 880-883
179	Heilongjiang	remote area	75	0	0	0	0					Shi W, Wang J, Bian Z, Wang Q (2005): Distribution and Evaluation of Main Heavy Metals and Available Microelements in Soils in the Northern Area of Heilongjiang Province. CHINESE JOURNAL OF SOIL SCIENCE 36, 880-883
179	Heilongjiang	remote area	83	0	0	0	0					Shi W, Wang J, Bian Z, Wang Q (2005): Distribution and Evaluation of Main Heavy Metals and Available Microelements in Soils in the Northern Area of Heilongjiang Province. CHINESE JOURNAL OF SOIL SCIENCE 36, 880-884
180	Heilongjiang	remote area	100	0	0	0			0			Wei D, Chi F, Shi W, Li S, Wang J (2007): Spatial Variability of Heavy Metals in Soils in the Southern Black soil Area of Heilongjiang Province. System Sciemces and Comprehensive Studies In Agriculture 23, 65-68
181	Heilongjiang	remote area	494	0.04	0	0	0	0	0.06	0.02	0	Chen Y, Wang H, Zhou J, Zhao Y (2012a): Heavy Metals Distribution Characteristics and Pollution Assessment in Farmland Soils of Hailun City, Heilongjiang Province. Soils 44, 613-620
182	Liaoning	Remote area	8	0	0		0	0		0	0	Wang Y, Chen Y, Meng S, Hao X, Zang C (2008): Soil investigation and evaluation of heavy metals of vegetable production base in Chang Xing, Heishan XIANDAI NONGYE KEJI, 38-38
183	Hunan	Urban	179	0.67	0.561453	0	22.3441	6.70061	4.67	0	1.67346	Zhou J 2005: Hengyang county main agricultural products producing area of soil heavy metal pollution research, Agricultural University Of Hunan
184	Liaoning	Cu	7	0	0	0	28.5714					Liu G, Liang C, Du L, Chen X, Wang F (2006): Primary Study of Heavy Metal Contamination of Soil in the Area of Hongtou Mountians. Chinese Agricultural Science Bulletin 22, 364-367
185	Hunan	Irrigation	19	0	0	0	31.58	0	0			Liu c 2011: Major river basin of hunan province soil heavy metal pollution, and the evaluation of the potential risks, Hebei agricultural university,
185	Hunan	Irrigation	72	22.22	25	22.22	50	22.22	9.72			Liu c 2011: Major river basin of hunan province soil heavy metal pollution, and the evaluation of the potential risks, Hebei agricultural university,
185	Hunan	Irrigation	36	2.78	0	0	52.78	0	0			Liu c 2011: Major river basin of hunan province soil heavy metal pollution, and the evaluation of the potential risks, Hebei agricultural university,
185	Hunan	Irrigation	43	0	0	2.27	88.64	18.2	4.55			Liu c 2011: Major river basin of hunan province soil heavy metal pollution, and the evaluation of the potential risks, Hebei agricultural university,
186	Hunan	Urban	54	14.8	0	27.8	33.3	3.7		3.7	13	Xi C, Dai T, Zhang H, Liu W (2008): Investigation and Assessment on Pollution of Soil Heavy Metals in Xiangtan City. Bulletin of Soil and Water Conservation 28, 133-137
187	Zhejiang	Remote area	52	0	0	0	15.4	3.8	3.8	0	11.5	Chen J, Zhang H, He X, Cao Y, Yang G (2010): Distribution and Evaluation on Potential Ecological Risk of Heavy Metals in Soils of Huzhou. SOILS 42, 595-599
188	Hunan	Urban	20		0		35	20		5	5	Li L, Chen B (2011): Survey and Evaluation of Heavy Metal Contamination of Soils and Vegetables in Huaihua. Academic Periodical of Farm Products Processing, 133-135
189	Guizhou	Remote area	12	0	0							Jin Q (2012b): Renhuai each soil heavy metal lead in the investigation.
190	Henan	Irrigation	32		52.5		0					Miao y, Wang Y, Wang Q, Li H (2010): Huaihe river and its tributaries soil heavy metal lead and cadmium content and evaluation. Jiangxi agricultural journals 22, 104-107
190	Henan	Irrigation	32		60.87		4.2					Miao y, Wang Y, Wang Q, Li H (2010): Huaihe river and its tributaries soil heavy metal lead and cadmium content and evaluation. Jiangxi agricultural journals 22, 104-107
190	Henan	Irrigation	40		72		15.63					Miao y, Wang Y, Wang Q, Li H (2010): Huaihe river and its tributaries soil heavy metal lead and cadmium content and evaluation. Jiangxi agricultural journals 22, 104-107
190	Henan	Irrigation	72		74.55		2.64					Miao y, Wang Y, Wang Q, Li H (2010): Huaihe river and its tributaries soil heavy metal lead and cadmium content and evaluation. Jiangxi agricultural journals 22, 104-107
190	Henan	Irrigation	64		75.76		2.15					Miao y, Wang Y, Wang Q, Li H (2010): Huaihe river and its tributaries soil heavy metal lead and cadmium content and evaluation. Jiangxi agricultural journals 22, 104-107
191	Anhui		78	0	0	0	0		1.28205	0		Xiao X, Zhao N, Yuan J (2014): A town in the huaihe river basin, characteristics of agricultural soil heavy metal content and the evaluation of the pollution. Spectroscopy and spectral analysis 7, 014
192	Anhui	Urban	113						8.85			Fang A, Hu Y, Niu S, Guan Y (2011): Distribution Characteristic and Assessment of Nickel Contents in Soil in Newly-developed Shannan District of Huainan City. Journal of Anhui University of Science and Technology：Natural Science 31, 21-24
193	Anhui	Coal	11	0	0	0				0		Li H, Yan S, Cui L (2008b): Huainan xinji mine soil heavy metal pollution evaluation. The mining safety and environmental protection 35, 36-37
194	Guangxi	Pb/Zn	21		61.9048	76.1905	84.6154	28.5714	0	0		Zhang X, Liu Y (2010b): Big huanjiang guangxi hechi plate force village offshore fields analysis of heavy metal pollution. Agricultural journal of environmental science 29, 80-83
195	Hubei	Remote area	91	0	0	2.1978	0	0	3.2967	0	0	Yang J, Chen J, Cao S, Zhang Y, Wang G, Wang X, Chen L (2009): Assessment of heavy metals in tobacco planting soils in areas surrounding Shennongjia and their accumulation characteristics. Acta Tabacaria Sinica 15, 31-34
196	Henan		48		0		0	0		0	0	Zhang P, Qin M, Chen L, Hu C, Zhao Y, Dong W (2013c): The lower reaches of the Yellow River Yellow River in kaifeng period of soil heavy metal distribution characteristics and the potential risk assessment. Environmental science 34, 3654-3662
197	Hubei	Remote area	95	37	0	0	6				11	Cai W (2009): Study on the Conditions of Heavy Metal Contamination of Basic Farmland Soil of Huangshi City. ENVIRONMENTAL SCIENCE AND MANAGEMENT 34, 80-82
197	Hubei	Remote area	95	49	32	0	12				16	Cai W (2009): Study on the Conditions of Heavy Metal Contamination of Basic Farmland Soil of Huangshi City. ENVIRONMENTAL SCIENCE AND MANAGEMENT 34, 80-82
198	Hubei	Urban	21	57	38	43	0		4.8			Cai W, He Z, Liu H (2006): Study on the Conditions of Heavy Metal Contamination of Vegetable Farm Soil in the Suburb of Huangshi city. JOURNAL OF HUANGSHI INSTITUTE OF TECHNOLOGY 22, 69-72,76
199	Gansu	Pb/Zn	27	3.7037	37.037	25.9259	100					Zeng Y, Ye Z (2009): Characteristics and Assessment of Soil Contamination by Heavy Metals Around Zinc Smelling Plant of Huxian. SCIENCE & TECHNOLOGY INFORMATION, 346-347
200	Heilongjiang	Coal	25	0	0	0	0	0	0	0	0	Gu Y (2011): Assessment of Soil Environmental Quality in Typical Coal Mining Areas in Jixi and Hegang,Heilongjiang Province. Journal of Northeast Forestry University 39, 117-119
200	Heilongjiang	Coal	27	3.7	0	0	3.7	0	11.1	3.7	0	Gu Y (2011): Assessment of Soil Environmental Quality in Typical Coal Mining Areas in Jixi and Hegang,Heilongjiang Province. Journal of Northeast Forestry University 39, 117-119
201	Yunnan	Remote area	1187	1.1	3.6	25.68	0.91	0.01		0		Li D 2012: Based on GIS and statistical interpolation of spatial distribution of soil heavy metals and pollution evaluation research, Kunming university of science and technology
202	Henan	Remote area	54		0		0	0		0	0	Li L, Feng X, Lu J, Chen W, Lv Q, Wu K (2008c): Evaluation of soil environmental quality in agricultural production areas based on different standards in Zhengzhou City. Transactions of the Chinese Society of Agricultural Engineering 24, 89-94
203	Jiangsu	Remote area	7	0	0		0	0	0	0	0	Zhou S, Liao F, Wu S, Ren K, Zhang H, Li Z (2008): Farmland soil heavy metal pollution in typical areas of Jiangsu Province based on classification sample plots. Transactions of the Chinese Society of Agricultural Engineering 24, 78-83
203	Jiangsu	Remote area	7	14.2857	0		14.2857	0	0	0	14.2857	Zhou S, Liao F, Wu S, Ren K, Zhang H, Li Z (2008): Farmland soil heavy metal pollution in typical areas of Jiangsu Province based on classification sample plots. Transactions of the Chinese Society of Agricultural Engineering 24, 78-83
204	Jiangsu	Urban	14				100					Yang Y, Li L, Yu Y, Li D, Yang J (2012): Analysis of Heavy Metals Distribution Characteristics and Sources Based on Agricultural Region Statistics of Taihu Lake Basin. Research of Environmental Sciences 25, 1319-1327
205	Jilin	oil	3	0	0		0	0				Ren J, Liu F, GAo W (2009): Study of Effection on Soil aroud Farmland by Exploited Oil Field in Daan, Jilin. ENVIRONMENTAL PROTECTION SCIENCE 35, 95-97,127
206	Jilin	Irrigation	97	1.03175	0	0	4.81464	0			0	Liang H, Cao T, Zhang L (2012): Jilin province farmland heavy metal content and its accumulation in plants. Jilin agricultural science 36, 59-62
207	Jilin	remote area	85		0		2.35294	0			0	Cao T, Liang J, Chen B, Wang H, Wang N, Liu C, Yu L, Zhu P (2013): Safety Evaluation on Heavy Metal Content of Pb, Cd, Hg, Se in Different Types of Agriculture Soil in Jilin Province. Jilin Agricultural Sciences 38, 30-33
208	Jilin		50	0	0	0	0		0	0		Wang h 2014: Jilin province soil - compound pollution of heavy metals in rice assessment system of environmental quality analysis and research, Graduate school of Chinese academy of sciences (northeast institute of geography and agricultural ecology)
208	Jilin		70	0	0	0	0.67		0	0		Wang h 2014: Jilin province soil - compound pollution of heavy metals in rice assessment system of environmental quality analysis and research, Graduate school of Chinese academy of sciences (northeast institute of geography and agricultural ecology)
209	Jilin	remote area	144	0	0	0	0	0	0	0	0	Huang X, Chai S, Zhang Q, Gao L (2010): In the west of jilin province forms of heavy metals in soil and its potential ecological impact assessment. Science, technology and engineering, 1717-1722
210	Heilongjiang	Remote area	156	0	0					0	0	Niu J, Wang Q, Guo Q, Yu Y, Li Y, Huang C, Li F (2011): Heavy metals spatial distribution character of Jixian county farmland soil. JOURNAL OF NORTHEAST AGRICULTURAL UNIVERSITY 42, 113-116
211	Yunnan	Remote area	7					28.5714				Zhang A, Yang L, Sun W, Zu Y (2012): Content of Arsenic and Its Influencing Factors in Several Vegetables. Journal of Anhui Agricultural Sciences 40, 10100-10102
212	Shandong	Remote area	157	0	0	0	3.2	0		2.25	0.6	Zhang Y 2010b: Jinan agricultural research and evaluation of soil heavy metal pollution and preliminary study of the effects on animals and plants, Shandong normal university.
213	Heilongjiang	Remote area	174		0		0	0	0		0	Li Y, Li J (2012): Jiamusi soil environmental quality research. Chinese journal of environmental management cadre institute 22, 15-18
214	Zhejiang	Remote area	80	18.8	0	6.3	3.8	0	63.8	0		Hong C, Huang J, Ye Z, Jia Y (2009): Vegetable soil heavy metal content analysis of the preliminary investigation in Jiaxing. Agro-Environment and Development, 76-79
215	Hubei	remote area	414		0		9.4	0		0	0	Xu H, Zhu L, Yang J, Hu S, Zhou X, Pan L, Song H (2011a): Survey and Evaluation of Heavy Metal Pollution in Soil of Jiayu Vegetable Base. HUBEI AGRICULTURAL SCIENCES 50, 1347-1349
216	Jiangsu	Remote area	1282	0.0780031	0	0.0780031	1.71607	0.0780031	0.0780031	0	1.24805	Wang G, Hua M, Zheng J, Zhu B (2006a): Evaluation on distribution and pollution of soil heavy metals in Jiangdu City. JIANGSU GEOLOGY 30, 294-298
217	Jiangsu		3121	2.4	0.16	0.7	4.36	0.29			21.5	Pan Y, Liao Q, Hua M (2014): The magnetism of the typical in southern jiangsu in evaluation of heavy metals in soil and crops. Geophysical and geochemical exploration 38, 318-324
218	Jiangsu	Remote area	149		0			0				Wu X, Xu Q, Wang J, Bian X (2005): Soil heavy metal pollution of conventional farmland in Nantong, Jiangsu JIANGSU AGRICULTURAL SCIENCES, 124-126
218	Jiangsu	Remote area	100		2			0				Wu X, Xu Q, Wang J, Bian X (2005): Soil heavy metal pollution of conventional farmland in Nantong, Jiangsu JIANGSU AGRICULTURAL SCIENCES, 124-126
218	Jiangsu	Urban	29		6.89655			0				Wu X, Xu Q, Wang J, Bian X (2005): Soil heavy metal pollution of conventional farmland in Nantong, Jiangsu JIANGSU AGRICULTURAL SCIENCES, 124-126
218	Jiangsu	Remote area	72		11.1111			0				Wu X, Xu Q, Wang J, Bian X (2005): Soil heavy metal pollution of conventional farmland in Nantong, Jiangsu JIANGSU AGRICULTURAL SCIENCES, 124-126
218	Jiangsu	Remote area	187		19.2513			0				Wu X, Xu Q, Wang J, Bian X (2005): Soil heavy metal pollution of conventional farmland in Nantong, Jiangsu JIANGSU AGRICULTURAL SCIENCES, 124-126
218	Jiangsu	Remote area	190		20.5263			1.60428				Wu X, Xu Q, Wang J, Bian X (2005): Soil heavy metal pollution of conventional farmland in Nantong, Jiangsu JIANGSU AGRICULTURAL SCIENCES, 124-126
218	Jiangsu	Remote area	179		27.933			28.777				Wu X, Xu Q, Wang J, Bian X (2005): Soil heavy metal pollution of conventional farmland in Nantong, Jiangsu JIANGSU AGRICULTURAL SCIENCES, 124-126
219	Jiangsu	Remote area	24186	1.97	0.04	0.18	1.3	0.64	2.91	0.41	2.07	Liao Q, HUa M, Jin Y, Huang S, Zhu B, Weng Z, Pan Y (2009): A preliminary study of the distribution and pollution source of heavy metals in soils of Jiangsu Province. GEOLOGY IN CHINA 36, 1163-1174
220	Jiangxi	Remote area	919	20.57	1.42	2.72	20.02			0.44		Chen C 2006a: Heavy metal pollution status evaluation and comparative study of time and space in Dexing, Jiangxi Thesis, Chengdu University of Technology
221	Jiangxi	Remote area	48	2.08333			4.16667	0	0	0	0	Xu C, Su Q, Li J, Fan F (2006): Farmland soil heavy metal content and pollution evaluation in Jiangxi The national farmland soil pollution monitoring and evaluation technology seminar, China's Inner Mongolia hailar, pp. 5
222	Jiangxi		30		0		3.33333	3.33333		6.66667	3.33333	Wen b, Zhang T, Li X, Xie Z (2014): Longnan region of jiangxi selenium-rich soil resources development feasibility study. China's geological 41, 256-263
223	Jiangxi	Remote area	1000	4.2	0.1	0.3	4.7	2.3	0	0	1.6	Yu J, Liu Y, Yao J (2008): Study on Heavy Metal Speciation and Accumulation in Paddy Soil of Jiangxi Province. ACTA AGRICULTURAE JIANGXI 20, 57-60,65
224	Jiangxi	Remote area	9	22.2222	0	22.2222		33.3333				Chen Y 2008: Jiangxi province new stem GAP base soil, and the evaluation of the heavy metals in Chinese medicinal materials, Nanchang university
225	Jiangsu	Remote area	144	0	0		3.47	0		0	0	Wang M, Wang H, Xue L (2006b): Heavy Metal Pollution of the Farmland of Jiangyin City and Its Evaluation. SOILS 38, 470-476
226	Gansu	Urban	26	69.23		0			76.92			Jin W, Nan Z, Liu X, Wang S, Li Y, Huang H, Zhao C (2010): SPECIATION AND BIOAVAILABILITY ASSESSMENT OF Cu, Zn AND Ni IN ARGRICULTURAL SOILS FROM JINCHANG, GANSU, CHINA.
227	Zhejiang	Remote area	9	0	0	0	44.4444					Zhang Y, Mao D (2012): Fuzzy Comprehensive Evaluation of Heavy-metals Polluted Degree for Selenium-rich Vegetable Soil in Jinhua City. Hunan Agricultural Sciences, 47-49
228	Shaanxi	Gold	46			2.17				0		Zhao y, Liu Y, He T, Shi J (2014): Spatial variation of gold mining area of soil heavy metal chromium and zinc. Mining research and development 5, 038
229	Liaoning	remote area	5	0	0	0	0	0	0	0	20	Bao S (2013): Jinzhou city basic farmland soil environment quality present situation and the analysis. Green technology, 184-185
229	Liaoning	remote area	5	0	0	0	40	0	0	0	0	Bao S (2013): Jinzhou city basic farmland soil environment quality present situation and the analysis. Green technology, 184-185
229	Liaoning	remote area	5	0	0	0	20	0	0	0	60	Bao S (2013): Jinzhou city basic farmland soil environment quality present situation and the analysis. Green technology, 184-185
230	Shandong	Remote area	60	10.0012	3.33333	1.66567	0					Cheng J, Zhang L (2013): In recent 20 years in shandong province farmland soil heavy metal content in the typical features and accumulation rate. Soils 45, 99-104
231	Shandong	Irrigation	60	8.33233	3.33333	1.66567	0					Cheng J, Zhang L (2013): In recent 20 years in shandong province farmland soil heavy metal content in the typical features and accumulation rate. Soils 45, 99-104
232	Shanxi	Coal	15	0	0		0	0		0	0	Qi X, Wang R, Qin H (2011): Research and Evaluation of Heavy Metal Content of Soil in Vegetables Production Base of Jincheng. Journal of Shanxi Agricultural University(Natural Science Edition) 31, 456-459
233	Shanxi	remote area	1733		0		0.115407	0		0	0.0577034	Wang R, Lv J (2008): Jinzhong basin development of pollution-free vegetables, soil environmental quality analysis.
234	Shaanxi	Coal	5	0	0		0			0		Zhao X, Huang S (2012): Analysis and Evaluation of Environmental Quality of Reclaimed Soil in Jun'AN Mining Area. Safety and Environmental Engineering 19, 59-61
235	Guizhou	Remote area	66		0		30.3	1.5		0	0	Qin S, Wang Z, Liu M (2007): Contents and Its Characters of Heavy Metals with Tobacco-Growing Soils in Zhengan County of Remote Karst Agricultural Area. Journal of Soil and Water Conservation 21, 72-75
236	Henan	Coal	5	0	0	0	0					Chen Z, Wang Y, Duan H, Zhao Z (2012b): Vertical distribution characteristics of heavy metals in agricultural soil profiles under rice-wheat system in Heigangkou Yellow River Irrigation Region. Chinese Journal of Eco-Agriculture 20, 480-487
237	Anhui	Coal	38	100	3.3	34.2	96.9					Li L, Wu P (2006): Mining area of soil heavy metal pollution status quo investigation. Anhui agricultural science 34, 3136-3137
238	Xinjiang	Irrigation	20	25	0	0	0	0			0	Li G (2004): Investigation on The Oil Heavy Metals Pollution by Wastewater Irrigation of Vegetable Plots in Kuitun City. Arid Environmental Monitoring 17, 218-221
239	Yunnan	Remote area	45	0	0		73.3333	0		0	6.67333	Chen J, Zhang N, Qin L, Chen H (2004a): Heavy metal pollution and pesticide residues in soils of Kunming area. RURAL ECO-ENVIRONMENT 20, 37-40
240	Yunnan	Urban	42	73.81	0	21.43	85.71					Zu Y, Li Y, Chen H, Chen J (2003): Kunming vegetables and the soil in the lead, cadmium, copper and zinc levels, and the evaluation of the pollution. Yunnan Environmental Science 22, 55-57
241	Yunnan	pb/zn	20		70	35	65					Peng M 2009: Orchid lead-zinc mine area surrounding soil and vegetables heavy metal pollution status in research. Thesis
241	Yunnan	pb/zn	20		15	0	85					Peng M 2009: Orchid lead-zinc mine area surrounding soil and vegetables heavy metal pollution status in research.
242	Gansu	Urban	50	0	0	0	4			0	0	Wang Y, Zhao J, Zhao G (2007): Analysis and Evaluation of Heavy Metal Content of Vegetable Garden Soil in Anning District of Lanzhou City. JOURNAL OF ANHUI AGRICULTURAL SCIENCES 35, 5804-5805
243	Gansu	Remote area	65				3.07692					Zhang B, Zheng H, Zhang R (2009a): Cadmium concentrations in vegetables and soils in Lanzhou City and its potential risk to human health. Journal of Gansu Agricultural University 44, 112-116
244	Shaanxi	Pb/Zn	11	100	45.4545	0	100					Zhang S 2009: Lantian smelter surrounding farmland compound pollution of heavy metals in soil and grain analysis and evaluation, Shaanxi Normal University
245	Yunnan	Cu	6		0		100					Su W 2010: Lancang river shelter-forest basin mining area water and soil mainly research of heavy metal pollution and human health effects, Dali college
245	Yunnan	Cu	3		0		100					Su W 2011: Lancang river shelter-forest basin mining area water and soil mainly research of heavy metal pollution and human health effects, Dali college
245	Yunnan	pb/	11		27.27		100					Su W 2012: Lancang river shelter-forest basin mining area water and soil mainly research of heavy metal pollution and human health effects, Dali college
245	Yunnan	Zn	4		50		100					Su W 2013: Lancang river shelter-forest basin mining area water and soil mainly research of heavy metal pollution and human health effects, Dali college
245	Yunnan	Pb/Zn	6		16.67		100					Su W 2014: Lancang river shelter-forest basin mining area water and soil mainly research of heavy metal pollution and human health effects, Dali college
246	Zhejiang	remote area	88	0	0		8	0		0	9.1	Zhao L, Huang P, Kong L (2005): Yueqing standard farmland of heavy metal content analysis. Zhejiang agricultural science 1, 0-398
247	Guangdong	Remote area	106	7.55	0	0	0	0	25.47	20.75	3.77	Guan H, Wan H, Wang X, Yang G, Zhu Y (2006): Distribution and pollution assessment of heavy metals in soil samples of Leizhou Peninsula. ENVIRONMENTAL POLLUTION AND CONTROL 28, 757-760,771
248	Sichuan	Urban	8	0	0		0	0		0	0	Xiao Z, Lan S, Tian X, Chen G, Su P (2010): Assessment of Heavy Metal Pollution in Soils of Lizhou Agricultural Products Base. SICHUAN ENVIRONMENT 29, 131-135
249	Guangdong		9	100	0	0	100	100	11.1111			Lin W, Lin Y (2014): The lianhua mining area of heavy metals in soil - crop systems control. Journal of ecological environment 4, 662-668
250	Sichuan	Remote area	8	75			25					Li J, Yuan J, Cai G, Peng Y, Gong F (2010a): Relations and Pollution Assessment of the Cd,Cu Content of Soil and Buckwheat in Liangshan Prefecture. Modern Agricultural Science and Technology, 307-308
251	Liaoning	Remote area	4767		0		1.43	0		0	0	Ren J, Yu C, Wang J (2012): Geochemical Characteristics and Spatial Variation of Heavy Metals in Soils from Main Rice Growing Regions of Liao River ---In the Case of Panjin. Chinese Journal of Soil Science 43, 1094-1097
252	Liaoning	Coal	33	0		0	0	0		0		Liu Z, Zhao P, Dong Z, Hu W (2011c): HEALTH RISK ASSESSMENT OF SOIL HEAVY METALS POLLUTION IN TIEFA MINING IN LIAONING PROVINCE. Energy Environmental Protection 25
253	Hunan	Remote area	376	0	0		4.23537	0.149202		0	0	Zhu Z, HuANG Q, Zhang Y, Xue J, Yang Q (2010): The Contents of Heavy-metals in Different Types of Cultivated Soil in Linli County and Its Evaluation of Environmental Quality. HUNAN AGRICULTURAL SCIENCES, 45-47
254	Gansu	Remote area	27		0		0	0		0	0	Hu M, Zhang X (2008): Lintao pollution-free vegetable base soil heavy metal pollution evaluation. AGRO-ENVIRONMENT AND DEVELOPMENT 25, 129-131，137
255	Shandong	Remote area	23	0	0	0	0	0	19.05	4.76	0	Zhao H, Liu P, Wan S, Zhang Y, Dong L, Yang L, Yu S (2011): Analysis and Evaluation on Soil Environmental Quality of Peanut Farmland in Linyi. Acta Agriculturae Jiangxi 23, 122-125
256	Shanxi	Remote area	6	0	0	0	0	0	0	0	0	Ge Y, Cui X, Zhang X, Feng L (2013): Vegetable origin of soil heavy metal pollution evaluation in Lingqiu county. Journal of Shanxi Agricultural Sciences 41, 163-166
257	Zhejiang	remote area	3	0	0		0	0		0	0	Liu N, Cheng W, Zhu G (2006): Willow wax plum GAP base of ecological environment quality evaluation [J]. Modern Chinese medicine research and practice 20, 10-11
258	Anhui	Urban	25	0	0	0	18.33		35.43			Wang G, Wang Y (2007): Regarding luan vegetable soil and vegetables heavy metal pollution evaluation. West anhui university journal 23, 67-71
259	Jilin	Remote area	20	20	0	55	95					Jin C, Jin M, Yuan C, Zhou S (2011): Evaluation of Heavy Metal Pollutions in Farmland Soil of Suburb in Longjing City. Journal of Anhui Agricultural Sciences 39, 20433-20434,20440
260	Gansu	Oil	39	0	0	0	100		0	0		Liang J 2011: Study on soil's heavy metal contents and soil quality evaluation of LongDong tableland area. master Thesis, Lanzhou University
260	Gansu		33	0	0	0	100		0	0		Liang J 2011: Study on soil's heavy metal contents and soil quality evaluation of LongDong tableland area. master Thesis, Lanzhou University
260	Gansu		14	0	0	0	100		0	0		Liang J 2011: Study on soil's heavy metal contents and soil quality evaluation of LongDong tableland area. master Thesis, Lanzhou University
261	Gansu		32		0		0	0		0	0	SHi J, Li X, Hu m, Xu W, Xu M, Jiao J (2014): Longnan Chinese herbal medicine base soil heavy metal content and evaluation. Gansu agricultural science and technology, 29-32
262	Shandong	Remote area	28				0					Sun X, Zheng Y, Cheng B, Wang C, Wu Z, Wang Z (2006): Between export zones in peanut field and its products. China's agriculture notified 22, 368-370
263	Shandong		137	0	0	0	0	0	0	0	0	Cao J, Zhang B, Dong J, Wang Y, Zhou C (2010): Regulation of major grain producing areas of farmland soil heavy metals and organochlorine pesticide pollution research. Jiangsu Agricultural Sciences, 307-309
264	Shaanxi	Remote area	40	0	0			0		0		Zhu M, PAng J, Zhang W, Li X, Chang M, Zhang C (2009b): Investigation and Assessment on Heavy Metals of Agricultural Soil and Apple Orchard Soil in Luochuan. System Sciemces and Comprehensive Studies In Agriculture 25, 142-146
265	Henan		38	0	0	0				0		Bai S, Lu S (2007): Analysis and Evaluation on Concentration of Heavy Metals in Soils of Industrial Area and Suburb Cropland of Luoyang City. Journal of Agro-Environment Science( J. Agro-Environ. Sci.) 26, 257-261
266	Henan		4	0	0	0	0				0	Zhu S, Dong T, Jiang Y (2008): Luoyang suburb vegetable to the research of heavy metal content in soil and vegetables. Anhui agricultural science 36, 837-839
267	Henan		11	0	0	0	36.3636			0		Cheng Y, Zhou y (2010): Luoyang heavy metal content in vegetable base soil sampling analysis and evaluation. Trace elements in guangdong science 17, 41-45
268	Hubei	remote area	45	0	0		0				0	Shen T, Xiao J, Jiang S, Wang Y (2013b): Tianmen city soil of green food ecological risk early warning and assessment of heavy metals. Agricultural environment and ecology security, the fifth national agricultural academic conference on environmental science
269	Shaanxi	coal	41		0	24.3902	4.87805			0		Liu X 2010: Coal mining area of soil heavy metal pollution of space points of the opposite sex, Xian university of science and technology,
270	Guangxi	Mn Ore	5	20	100	0	100			0		Lai Y, Tang W, Deng H, Li M, Yu F, Li Y (2009): Fuzzy Synthetic Assessment of Heavy Metal Contamination in Crop-reclaimed Mn Minelands. JOURNAL OF GUANGXI NORMAL UNIVERSITY(NATURAL SCIENCE EDITION) 27, 76-80
270	Guangxi	Mn Ore	5	100	80	40	100			40		Lai Y, Tang W, Deng H, Li M, Yu F, Li Y (2009): Fuzzy Synthetic Assessment of Heavy Metal Contamination in Crop-reclaimed Mn Minelands. JOURNAL OF GUANGXI NORMAL UNIVERSITY(NATURAL SCIENCE EDITION) 27, 76-81
270	Guangxi	Mn Ore	5	80	100	60	100			20		Lai Y, Tang W, Deng H, Li M, Yu F, Li Y (2009): Fuzzy Synthetic Assessment of Heavy Metal Contamination in Crop-reclaimed Mn Minelands. JOURNAL OF GUANGXI NORMAL UNIVERSITY(NATURAL SCIENCE EDITION) 27, 76-82
270	Guangxi	Mn Ore	1	100	0	0	0			0		Lai Y, Tang W, Deng H, Li M, Yu F, Li Y (2009): Fuzzy Synthetic Assessment of Heavy Metal Contamination in Crop-reclaimed Mn Minelands. JOURNAL OF GUANGXI NORMAL UNIVERSITY(NATURAL SCIENCE EDITION) 27, 76-83
270	Guangxi	Mn Ore	3	100	0	33	100			0		Lai Y, Tang W, Deng H, Li M, Yu F, Li Y (2009): Fuzzy Synthetic Assessment of Heavy Metal Contamination in Crop-reclaimed Mn Minelands. JOURNAL OF GUANGXI NORMAL UNIVERSITY(NATURAL SCIENCE EDITION) 27, 76-84
270	Guangxi	Mn Ore	1	0	0	0	100			0		Lai Y, Tang W, Deng H, Li M, Yu F, Li Y (2009): Fuzzy Synthetic Assessment of Heavy Metal Contamination in Crop-reclaimed Mn Minelands. JOURNAL OF GUANGXI NORMAL UNIVERSITY(NATURAL SCIENCE EDITION) 27, 76-85
271	Anhui	Remote area	59	0		0			0	0		Yuan S, Zhao Y, Li Q, Sun L, Liu D (2008): Study on Heavy Metal Content Character in Agricultural Soil in Mihe Basin and Its Influencing Factors. JOURNAL OF ANHUI AGRICULTURAL SCIENCES 36, 4237-4238,4240
272	Sichuan		15	0	0	0	0	0	0	0	0	Sun j, Ouyang C, Su H, Li J (2014): Mianyang city major vegetable base soil heavy metal pollution characteristics and assessment. Mianyang normal university journal 33, 120-125
273	Fujian	Remote area	573	4.19	0.17	0.52	3.16	0.87			8.2	Zheng H (2013): Spatial Variability and Pollution Assessment of Heavy Metals in Southeastern Fujian Soil. Jilin Normal University Journal：Natural Science Edition 34, 32-37
274	Henan		6	0	0	0	100	100		0	0	Yu Y, Hu L (2010): A typical agricultural areas of farmland preliminary evaluation of the health risks of soil heavy metal pollution. Environmental and health magazine, 693-696
275	Shandong	电镀	18							0		Chen Z, Wang Y, Yu M, Li J (2010b): Investigation for Chromium-Polluted Soil and Characteristics of Plant Accumulation nearby Electroplating Factory. CHINESE AGRICULTURAL SCIENCE BULLETIN 26, 363-368
276	Liaoning	Mu mining	60	11.67	3.33	16.67	100	8.33	13.33	10	95	Cong Q, Cong F (2009): Ecological Risk Warning Assessment of the Soil Polluted by Heavy Metals in the Vegetable Land Irrigated with Wastewater around the Areas of Molybdenum Ore. Environmental Protection Science 35, 63-65
277	Jiangxi	Remote area	8	0	0	0	0					Zhu M, Luo Y, Zhao X, Lu Z, Wei X (2005): Survey and Evaluation of Heavy Metal Contamination of Soil and Vegetables in the Vegetable Bases in Suburbs of Nanchang. ACTA AGRICULTURAE UNIVERSITATIS JIANGXIENSIS 27, 781-784
277	Jiangxi	Remote area	8	0	0	0	0					Zhu M, Luo Y, Zhao X, Lu Z, Wei X (2005): Survey and Evaluation of Heavy Metal Contamination of Soil and Vegetables in the Vegetable Bases in Suburbs of Nanchang. ACTA AGRICULTURAE UNIVERSITATIS JIANGXIENSIS 27, 781-784
278	Sichuan	Urban	26		0		15.3846	0		0	3.84615	He Z (2009): Nanchong suburbs vegetable base soil heavy metal pollution condition investigation and evaluation. AGRO-ENVIRONMENT & DEVELOPMENT 26, 91-94
279	Sichuan	Remote area	80	56.25	6.25	0	56.25			0		Pan D, Zhang Y, Li C, Sun H (2006): Contents and Evaluation of Heavy Metals in Soil of Nanchong City. JOURNAL OF CHINA WEST NORMAL UNIVERSITY(NATURAL SCIENCES) 27, 221-224
280	Fujian	稀土	6	66.6667	0	0	100	33.3333	0	0		Li X, Chen Z (2013): The southern mining ground soil and vegetables heavy metal content and its health risk assessment. Journal of soil and water conservation, 146-151
281	Jiangsu	Urban	75	100	2.67	52	100					Zhou W, Li R, Yue H, Shen S, Zhu H, Xie X (2009): Characteristics and Assessment of Heavy Metal Pollution in Vegetable Soils in Jiangbei Area of Nanjing City. JOURNAL OF NANJING INSTITUTE OF METEOROLOGY 32
281+282	Jiangsu	Remote area	85	88.2353	2.35588	52	88.2353	0	0	0	0	Zhou W, Li R, Yue H, Shen S, Zhu H, Xie X (2009): Characteristics and Assessment of Heavy Metal Pollution in Vegetable Soils in Jiangbei Area of Nanjing City. JOURNAL OF NANJING INSTITUTE OF METEOROLOGY 32
283+284	Guangxi	Urban	32	0	7.5	0	53.75	19.9988		20	2.5	Chen P, Yang M, Zhu X, Zheng X, Luo D, Bai H, Jiang D, Fang Y (2004b): Investigation and evaluation of heavy metal pollution in the ecological agriculture planning area soils of Hezhou in Nanning. JOURNAL OF GUANGXI AGRICULTURAL AND BIOLOGICAL SCIENCE 23, 72-75
285	Neimenggu	Irrigation	8							0		Wang Z, Zhang Q, Cheng L, Tong L, HAi Q (2012): Inner Mongolia baotou city sewage irrigation farmland soil chromium potential ecological risk assessment. Jiangsu Agricultural Sciences 40, 344-346
286	Neimenggu	Irrigation	8							0		Wang Z, Zhang Q, Cheng L, Tong L, HAi Q (2012): Inner Mongolia baotou city sewage irrigation farmland soil chromium potential ecological risk assessment. Jiangsu Agricultural Sciences 40, 344-346
287	Neimenggu		3	0	0		0	0			0	Li W, Chen G, Yu Q, Yu R, Bao H, Yu T (2014): Licorice and heavy metal content in soil and different regions of Inner Mongolia. Journal of Inner Mongolia university (natural science edition) 6, 016
287	Neimenggu		3	0	0		0	0			0	Li W, Chen G, Yu Q, Yu R, Bao H, Yu T (2014): Licorice and heavy metal content in soil and different regions of Inner Mongolia. Journal of Inner Mongolia university (natural science edition) 6, 016
287	Neimenggu		3	0	0		0	0			0	Li W, Chen G, Yu Q, Yu R, Bao H, Yu T (2014): Licorice and heavy metal content in soil and different regions of Inner Mongolia. Journal of Inner Mongolia university (natural science edition) 6, 017
288	Neimenggu	Remote area	54	44.4444	0	0	0	0	11.1111	0	0	Zhang F, You M, Liu J, Luo H, Feng X, Ren C (2008): Analysis of Heavy Metal Pollution in Vegetable Field in Inner Mongolia Suburb. INNER MONGOLIA AGRICULTURAL SCIENCE AND TECHNOLOGY, 74-75,88
289	Neimenggu	irrigation	4	0	0	0	25		25			Wang G, Sun L (2007): Investigation and Appraisal of the Heavy Metal Pollution of Soil in Sewage Irrigation in Eastern Inner Mongolia. SHANXI SCIENCE AND TECHNOLOGY, 115-116
290	Neimeng	Remote area	7983	0.012	0.012	0.025	0.037	0.037	0.025	0	0.037	Bao F, Li Y, Li J, Hao X, Ma Z, Zhao L Evaluation on Soil Environmental Quality in the Hetao Area of Inner Mongolia.
291	Neimeng	Remote area	102	0	0	0	0	0		0	8	Pang L, Zhang F, Li X, Cui Y, Feng X, Liu J (2011): Heavy Metal Content in Agro-pastoral Transition Area and its Differentiation. Inner Mongolia Agricultural Science and Technology, 71-72
292	Neimenggu		1564	0	0	0	0	0	0	0	0	Zhu Y, Wang X, MAo X, Liu Y (2009c): Analysis and Fuzzy Comprehensive Assessment of Heavy Metal Contamination of Soil in Tuoketuo Area,Inner Mongolia. GEOSCIENCE 23, 365-371
293	Neimeng	remote area	30	0	0	0	0	0	0	0	0	Kang W, Xu Y, Yao X (2014): Ejin horo banner, Inner Mongolia agricultural soil environmental quality assessment study. Earth and Environment
294	Zhejiang	Urban	100		0		1	0		0	1	Wang B (2010): Ningbo yinzhou district agricultural soil heavy metal content and evaluation. Agro-Environment and Development 27, 85-87
295	Ningxia	remote area	200		0		3					Liu F, Wu H, Xu B (2013): Part of ningxia rural soil cadmium and lead the investigation. Journal of Environment and Health 30, 843
296	Ningxia	Irrigation	20	0	0	0	0	0		0	0	Li H, Mao L, Ren X (2008a): The determination and evaluation of heavy metals content in crop and soil at Hongsipu region. NINGXIA ENGINEERING TECHNOLOGY 7, 9-11
297	Ningxia	Power Plant	27	0	0	0				0		Fu Y 2010a: The spatial distribution and pollution of heavy metals in soil around coal-fired power plant in ningxia evaluation research [D], Beijing forestry university
297	Ningxia	Power Plant	54	0	0	0				3.7		Fu Y 2010b: The spatial distribution and pollution of heavy metals in soil around coal-fired power plant in ningxia, Beijing forestry university
298	Ningxia	urban	11	0	0	0	0	0	0	0	0	Liu Z, Wang J, Jiang X, Yong J (2005): Soil environmental quality monitoring and evaluation of basic farmland protection areas in Ningxia. NINGXIA JOURNAL OF AGRICULTURE AND FORESTRY SCIENCE AND TECHNOLOGY 2, 28-30
299	Jilin	Remote area	162	0	0		0			0	1.3	Sun L 2008: Farmland soil heavy metal pollution evaluation and spatial distribution research in Nong'an County.
300	Henan	Remote area	15
301	Shandong	Remote area	29	0	0	0	34.4621	0		0	0	Huang S, Jin J, He A (2007a): Farmland soil heavy metal under different ways of using regional differentiation and evaluation. Agricultural journal of environmental science 26, 540-548
301	Beijing		22	0	0	0	59.0955	0		0	0	Huang S, Jin J, He A (2007a): Farmland soil heavy metal under different ways of using regional differentiation and evaluation. Agricultural journal of environmental science 26, 540-548
301	Hebei	Remote area	48				81.2646					Huang S, Jin J, He A (2007): Farmland soil heavy metal under different ways of using regional differentiation and evaluation. Agricultural journal of environmental science 26, 540-548
301	Tianjin	Remote area	28				100					Huang S, Jin J, He A (2007): Farmland soil heavy metal under different ways of using regional differentiation and evaluation. Agricultural journal of environmental science 26, 540-548
302	Jiangsu	Remote area	235	8.5	2.6	3.4	3	0		0	30.6	Ma C, Zhou J, Wang H (2006): Farmland soil heavy metal pollution evaluation method research - changshu city, the typical county-level cities in Yangtze river delta as an example. Journal of ecology and rural environment 22, 48-53
303	Sichuan	remote area	25	0	0	4	36	0	0	0	0	Zhou Y, Yang D, Lei S (2008): Major vegetable base soil heavy metal content and evaluation in panxi region. Sichuan environment 27, 67-70
304	Gansu		147		0		0	0		0	0	Wang L (2013): Investigation and Evaluation of Cumulative of Soil Heavy Metals in Vegetable Field of Pingliang. Gansu Agricultural Science and Technology, 30-32
305	Shanxi		68		0		0	0		0	0	Tao J, Zhao M, Li H, Xu Y, Jiang H (2014): Pinglu county planting tobacco soil heavy metal content distribution and safety evaluation and research. Journal of henan agricultural university 48, 11-15
306	Fujian	Urban	42	0	0	0	0		0	0		Li J (2007): Studying of Distribution of Heavy Metal in Vegetable Farm Soil in the Suburb of Putian City.
307	Shaanxi	Remote area	37	24.3243	0							Hu M (2013): Pucheng soil heavy metal pollution assessment and distribution characteristics. Henan agricultural science 42, 57-60
308	Guangdong	Pb/Zn	80	80	93.3	83.33	100					Yang Q, Shu Y, Lin Z, Lin L, Zou H, Lan Z (2003): Compound Pollution and Ecological Evaluation of Heavy Metals from Mining Waste Water to Soil-Rice Plant System. Journal of Agro-Environment Science( J. Agro-Environ. Sci.) 22, 385-390
309	Guangxi	pb/zn	91	19	36	97	100	36	41	21	84	Zhang C, Li Z, Deng C (2009): The statistical analysis of soil heavy metal lead and zinc mine and spatial distribution research. Shanghai environmental science 28, 253-257
310	Guizhou	Remote area	9	88.8889	0		77.7778	0			0	Li C, Wang X, Wu D, Yang J (2011): Research on the Content and Pollution Evaluation of Heavy Metals in Dictyophora rubrovalvata Growing Areas of Northwestern Guizhou Province. Hubei Agricultural Sciences 50, 3739-3742
311	Guizhou	pb/zn	10		40		100					Wu Y, Lin W (2008): Northwestern guizhou mill indigenous zinc smelting area Pb, Cd pollution and ecological restoration. Environmental protection science and technology 14, 34-36
312	Shaanxi	Pb/Zn	1	75	75	87.5	87.5					Wang L, Zhu E (2008): The study of heavy metals distribution character in soil about lead-zinc smelt mill in Qinling. Journal of Baoji University of Arts and Sciences(Natural Science Edition) 28, 150-152
313	Shandong	Remote area	14	0	0	0	0	0	0	0	0	Liu P, Jiang L, Wan S, Yang L, Yu S, Lin H, Song X (2009b): Analysis of soil quality of peanut farmland in Qingdao. Chinese Journal of Oil Crop Sciences 31, 51-55
314	Shandong	Remote area	15	0	0	0	6.66667	0		0	0	Chen J, Cai K, Zhao M, Wang W (2011): Investigation and Evaluation on Soil Heavy Metal Pollution of Main Vegetable Producing Areas in Qingdao City. SHANDONG AGRICULTURAL SCIENCES, 63-67
314	Shandong	Remote area	12	0	0	0	25	0		0	0	Chen J, Cai K, Zhao M, Wang W (2011): Investigation and Evaluation on Soil Heavy Metal Pollution of Main Vegetable Producing Areas in Qingdao City. SHANDONG AGRICULTURAL SCIENCES, 63-67
314	Shandong	Remote area	10	0	0	0	100	0		0	0	Chen J, Cai K, Zhao M, Wang W (2011): Investigation and Evaluation on Soil Heavy Metal Pollution of Main Vegetable Producing Areas in Qingdao City. SHANDONG AGRICULTURAL SCIENCES, 63-67
315	Qinghai	Remote area	13	0	0		0	0		0	0	Han M, Li X (2012): Risk Assessment of Soil Heavy Metal on Qinghai Plateau Huangshui Basin. Journal of Anhui Agricultural Sciences 40, 14244-14245
315	Qinghai	Remote area	19	0	0		0	0		0	5.26316	Han M, Li X (2012): Risk Assessment of Soil Heavy Metal on Qinghai Plateau Huangshui Basin. Journal of Anhui Agricultural Sciences 40, 14244-14245
316	Liaoning	breeding industry	1								0	Wang H, Li W (2011): The monitoring of QingHeMen breeding park residual mercury in the soil. LVSE DASHIJIU, 19-20
317	Yunnan	Remote area	96		1.04					0	5.21	Tang L, Zhou Y, Zhang Y, Xie Y, Huang Y (2010): Correlation Between Pb, Cr and Hg Contents in Flue-cured Tobacco and Soil Environmental Factors in Qujing Tobacco Growing Areas. TOBACCO SCIENCE & TECHNOLOGY 7, 53-57
318	Shandong	Remote area	445		0	0	5.2		1.1	0.09	2.2	Lv J, Zhang Z, Liu Y, Dai J, Wang X, Wang M (2012): Sources Identification and Hazardous Risk Delineation of Heavy Metals Contamination in Rizhao City. ACTA GEOGRAPHICA SINICA 67
319	Qinghai	remote area	129								0	Feng L, Zhang W, Xiu G, Gao X, Li B, Xu W, Huang Z (2014): Distribution of Mercury in Soil of Yushu and Maduo in the Three Rivers Source Region. Journal of Ecology and Rural Environment 30
320	Fujian	Urban	40		0			0		0	10	Zheng X, He X, Wang W (2005): Sanming suburb vegetable base soil nutrient and the status of the heavy metal content. Environment and development in agriculture 21, 46-47
321	Chongqing	remote area	5	0	0	0	0		0	0		Pei T, Wang La, Bao L, Zhong S, Song Z (2010): Jiang basin, the three gorges reservoir distribution characteristics and evaluation analysis of soil heavy metals. The soil on, 206-211
322	Hubei	remote area	12	0	0	0	0	0		0	0	Ye C, Li S, Bo D, Chen X, Zhang Q (2010): Down in the three gorges reservoir area before water storage of soil heavy metal content and ecological risk assessment. Journal of soil 47, 1264-1269
322	Chongqing	remote area	56	0	0	0	35.7143	0		0	0	Ye C, Li S (2010): Down in the three gorges reservoir area before water storage of soil heavy metal content and ecological risk assessment. Journal of soil 47, 1264-1269
323	Hainan	Remote area	74		0		0	0		0	1.35135	Li F, Li X, Wu P, Zhao X, Zhang D, Qi Z (2010a): Heavy metals in orchard and vegetable garden soils of Sanya City：Spatial distribution and contamination evaluation. Chinese Journal of Ecology, 382-386
324	Guangxi	remote area	1	0	0	0	0	0	0	0	0	Hu C, Lu L, Huang R, Luo X (2013): Amomum villosum cultivation base of environmental quality testing and evaluation. Anhui agricultural science 41, 2898-2899
325	Shandong	Remote area	37	0	0	0	10.8108					Han Y (2009): Shandong Texas area present situation investigation of soil heavy metal. Agricultural technology and equipment, 6-8
326	Shandong		39	0	0	0	0		0	0	0	Zhang J, Chen S, Deng H, Wu A, Sun W, Chen Y (2012): Part of the bank of shandong province with the soil heavy metal content and the evaluation of the pollution. Acta ecologica sinica 32, 3144-3153
326	Shandong	remote area	21	0	0	0	0	0	0	0	0	Liu P, Zhao H, Liu Z, Wang Y, Yang L, Yu S (2010): Outdoor vegetable producing area of shandong province the environmental quality analysis and evaluation of soil heavy metal content. Agricultural journal of environmental science 29, 1130-1136
326	Shandong	remote area	37	5.41	0	0	0	0	0	0	0	Liu P, Zhao H, Liu Z (2010): Outdoor vegetable producing area of shandong province the environmental quality analysis and evaluation of soil heavy metal content. Agricultural journal of environmental science 29, 1130-1136
326	Shandong	remote area	22	13.64	0	0	0	0	0	0	0	Liu P, Zhao H, Liu Z (2010): Outdoor vegetable producing area of shandong province the environmental quality analysis and evaluation of soil heavy metal content. Agricultural journal of environmental science 29, 1130-1136
327	Shandong	Remote area	601	0.68	0	0	0.17	0	8.7	0.17	0	Liu Q, DU Z, Shi Y, Zhan J, Pang X (2009a): Evaluation on Environmental Quality of Heavy Metals in Shouguang City,Shandong Province. ACTA AGRICULTURAE UNIVERSITATIS JIANGXIENSIS(NATURAL SCIENCES EDITION) 30, 144-148
328	Shanxi	remote area	396		0.045		0.18	0			0.18	Huang Q, Wu K, Zhao Y (2009): Shanxi qixian plain surface soil Hg, Cd, Pb, As the investigation and evaluation, Soil resources sustainable use and ecological environment security, director of Chinese soil learn the 11th second enlarged meeting and conference proceedings
329	Shanxi	remote area	126	0	0	0		0	18.254	0	15.873	Li W, Xie Y (2010): Assessment on Heavy Metal Pollution of Soil in Main Vegetable Areas of Shanxi Province. SCI-TECH INFORMATION DEVELOPMENT & ECONOMY 20, 30-33
330	Shanxi	Urban	12		0		0	0		0	0	Ma X, Qin J, Feng L (2009): Evaluation of Heavy Metal Pollution of Soil in Vegetables Production Base of Taigu. JOURNAL OF SHANXI AGRICULTURAL UNIVERSITY(NATURAL SCIENCE EDITION) 29, 100-103
331	Shaanxi	Remote area	652	0	0	0	0.306748	0	0.460123	0	0	Li Y (2008): Guanzhong major grain producing areas of soil environmental quality assessment in Shaanxi Agro-Environment and Development 25, 111-113
332	Shaanxi	Remote area	1		0	20						Lv S, Yu D (2012): In hangzhong han area in 2011 rural soil heavy metal lead, cadmium in the monitoring result analysis. Modern medicine and health care 28, 2550-2551
333	Shaanxi	Remote area	113	7.5	12.8	3	3	0.8		0	42.1	Zhao A 2006: Shaanxi tongguan gold mine area, farmland soil heavy metal pollution assessment and crop correlation analysis, Xi 'an: chang 'an university
334	Guangdong	Remote area	118	18.6	0	0	0	0.8	26.3	0	7.6	Guo Y, Yang G, Dong Q, Huang C (2007): Distribution of Heavy Metals in Soils from the Typical Regions of Shantou and Their Environmental Pollution ENVIRONMENTAL SCIENCE 28, 1067-1074
335	Shaanxi	Remote area	30		0		0	0		0	0	Zhang X, Zhai B, Zhang X, He J (2011c): Kadsura shangluo area of soil heavy metal content analysis and evaluation. Shaanxi Journal of Agricultural Sciences 57, 57-60
336	Shanghai	remote area	2265									Meng f, Liu M, SHi T (2008): Shanghai farmland soil heavy metal environment quality evaluation. Environmental science 29, 428-433
337	Zhejiang	Pb/Zn	9	100	100	100		100				Wang Y, Zhao Q, Hu Y, Du X, Ge W, Liu W (2011): SURVEY AND CONTAMINATION ASSESSMENT OF HEAVY METALS IN SOIL AND PLANTS AROUND THE Pb/Zn MINE IN SHANGYU,ZHEJIANG PROVINCE. Environmental Chemistry 7, 1355-1360
338	Liaoning	Remote area	2256	0	0		3.59	0		0	0.68	Hou L, Zhang D, Zhang Y (2011): The spatial distribution features and the status evaluation of heavy metal in farmland soils in Shenyang area. Journal of Liaoning Forestry Science ＆ Technology, 5-8+60
339	Liaoning	Irrigation	5				0			0		Wang H, Li W (2011): The monitoring of QingHeMen breeding park residual mercury in the soil. LVSE DASHIJIU, 19-21
339	Liaoning	Irrigation	5				0			0		Wang H, Li W (2011): The monitoring of QingHeMen breeding park residual mercury in the soil. LVSE DASHIJIU, 19-22
339	Liaoning	Irrigation	5				0			0		Wang H, Li W (2011): The monitoring of QingHeMen breeding park residual mercury in the soil. LVSE DASHIJIU, 19-23
339	Liaoning	Irrigation	5				0			0		Wang H, Li W (2011): The monitoring of QingHeMen breeding park residual mercury in the soil. LVSE DASHIJIU, 19-24
339	Liaoning	Irrigation	5				0			0		Wang H, Li W (2011): The monitoring of QingHeMen breeding park residual mercury in the soil. LVSE DASHIJIU, 19-25
339	Liaoning	Irrigation	5				0			0		Wang H, Li W (2011): The monitoring of QingHeMen breeding park residual mercury in the soil. LVSE DASHIJIU, 19-26
339	Liaoning	Irrigation	5				0			0		Wang H, Li W (2011): The monitoring of QingHeMen breeding park residual mercury in the soil. LVSE DASHIJIU, 19-27
339	Liaoning	Irrigation	5				0			0		Wang H, Li W (2011): The monitoring of QingHeMen breeding park residual mercury in the soil. LVSE DASHIJIU, 19-28
339	Liaoning	Irrigation	5				0			0		Wang H, Li W (2011): The monitoring of QingHeMen breeding park residual mercury in the soil. LVSE DASHIJIU, 19-29
339	Liaoning	Irrigation	5				0			0		Wang H, Li W (2011): The monitoring of QingHeMen breeding park residual mercury in the soil. LVSE DASHIJIU, 19-30
340	Liaoning	Irrigation	10		0	0	20				40	Yang J, Sun L, Yang X, Ma L (2007): Evaluation of the Heavy Metal Pollution in Farmland of Xihe River Outlet in Shenyang. Journal of Agro-Environment Science( J. Agro-Environ. Sci.) 26, 1933-1936
340	Liaoning	Irrigation	23		0	0	82				35	Yang J, Sun L, Yang X, Ma L (2007): Evaluation of the Heavy Metal Pollution in Farmland of Xihe River Outlet in Shenyang. Journal of Agro-Environment Science( J. Agro-Environ. Sci.) 26, 1933-1936
340	Liaoning	Irrigation	17		0	0	94				76	Yang J, Sun L, Yang X, Ma L (2007): Evaluation of the Heavy Metal Pollution in Farmland of Xihe River Outlet in Shenyang. Journal of Agro-Environment Science( J. Agro-Environ. Sci.) 26, 1933-1936
341	Hubei	Remote area	40	0	0	0	7.5	0	2.5	0	0	Wei X, Li Q, Shi F, Wu Z, Xu S (2012): Assessment of Heavy Metals in Soil,Surface Water and Tobacco Leaf in Shiyan Area and Their Correlations. Acta Agriculturae Jiangxi 24, 95-97
342	Xinjiang	Irrigation	130	0	0	0	16.92	9.23		0	0	Lou C, Pan N, Wen W, Ye J, Hou Z (2013): Assessment and Analysis of Heavy Metal Content in Farmland Soil in Shihezi Reclamation Area. Journal of Shihezi University（Natural Science） 31, 541-548
343	Hebei	Remote area	20		0		0					Guo Z, Cao L, Fan W, BAi P, Zhao M (2012): Shijiazhuang farmland soil lead and cadmium pollution survey. Journal of Environment and Health 29, 1126
343	Hebei	Remote area	20		0		5					Guo Z, Cao L, Fan W, BAi P, Zhao M (2012): Shijiazhuang farmland soil lead and cadmium pollution survey. Journal of Environment and Health 29, 1126
343	Hebei	Remote area	20		0		5					Guo Z, Cao L, Fan W, BAi P, Zhao M (2012): Shijiazhuang farmland soil lead and cadmium pollution survey. Journal of Environment and Health 29, 1126
343	Hebei	Remote area	20		0		20					Guo Z, Cao L, Fan W, BAi P, Zhao M (2012): Shijiazhuang farmland soil lead and cadmium pollution survey. Journal of Environment and Health 29, 1126
344	Hebei	Remote area	51	0	0	0	2.43902	0		0	0	Chen Y 2008: Evaluation of the effect of shijiazhuang city sewage irrigation area of ecological geochemistry of heavy metals, Shijiazhuang school of economics
344	Hebei	Remote area	51	0	0	0	2.43902	0		0	0	Chen Y 2009: Evaluation of the effect of shijiazhuang city sewage irrigation area of ecological geochemistry of heavy metals, Shijiazhuang school of economics
345	Hunan	Non-metallic minerals	27					53.9				Li L, Zeng X, Bai L, Li S (2010b): Soil arsenic content and its health risk assessment for agricultural products in the region surrounding Shimen arsenic sulphide mine. Chinese Journal of Applied Ecology, 2946-2951
346	Zhejiang	Leather production	10		0		60	0		0	0	Li E, Chen C, Kang X, Dong C, Wen Z (2009a): Heavy Metal Pollution Assessment of Soil and Rice of Shuitou Town. ENVIRONMENTAL SCIENCE SURVEY 28, 68-70
347	Sichuan		50	0	0		0	0			0
348	Sichuan	Remote area		0	0	0	25	0	0	0	0	Gan Y 2009: Sichuan land soil heavy metal element geochemical characteristics and quality evaluation, Chengdu university of technology
349	Sichuan	Remote area	18	0	0		66.6667	0		0	5.55556	Li J, Gong F, Peng Y (2012): Assessment on the Heavy Metals Pollution of Agricultural Produce Soil in Yuexi County. Journal of Xichang College 26, 10-12
350	Henan		25		0		0	0		0	0	Shi Y, Cheng A, Tao Q (2006): Song county radix bupleuri GAP base of environmental quality assessment. Modern Chinese medicine research and practice 20, 7-10
351	Jiangsu	Remote area	10	0	0	0	0	0	0	0	0	Jin L, Li L, Pan G, Wu X, Liao Q (2007): Distribution of Heavy Metals in the Soil-Rice System and Food Exposure Risk Assessment of North Jiangsu, China. JOURNAL OF ECOLOGY AND RURAL ENVIRONMENT 23, 33-39
351	Jiangsu	Remote area	9	0	0	0	0	0	0	0	0	Jin L, Li L, Pan G, Wu X, Liao Q (2007): Distribution of Heavy Metals in the Soil-Rice System and Food Exposure Risk Assessment of North Jiangsu, China. JOURNAL OF ECOLOGY AND RURAL ENVIRONMENT 23, 33-40
351	Jiangsu	Remote area	10	0	0	0	0	0	0	0	0	Jin L, Li L, Pan G, Wu X, Liao Q (2007): Distribution of Heavy Metals in the Soil-Rice System and Food Exposure Risk Assessment of North Jiangsu, China. JOURNAL OF ECOLOGY AND RURAL ENVIRONMENT 23, 33-41
351	Jiangsu	Remote area	20	0	0	0	0	0	0	0	0	Jin L, Li L, Pan G, Wu X, Liao Q (2007): Distribution of Heavy Metals in the Soil-Rice System and Food Exposure Risk Assessment of North Jiangsu, China. JOURNAL OF ECOLOGY AND RURAL ENVIRONMENT 23, 33-42
351	Jiangsu	Remote area	10	0	0	0	0	0	0	0	0	Jin L, Li L, Pan G, Wu X, Liao Q (2007): Distribution of Heavy Metals in the Soil-Rice System and Food Exposure Risk Assessment of North Jiangsu, China. JOURNAL OF ECOLOGY AND RURAL ENVIRONMENT 23, 33-42
351+352	Jiangsu	Remote area	51	0	0	0	0	0	0	0	0	Jin L, Li L, Pan G, Wu X, Liao Q (2007): Distribution of Heavy Metals in the Soil-Rice System and Food Exposure Risk Assessment of North Jiangsu, China. JOURNAL OF ECOLOGY AND RURAL ENVIRONMENT 23, 33-42
353	Jiangsu	Irrigation	5					0				Yan Y (2011): The Investigation on the Soil Arsentic Pollution in Irrigation Canal Region in the North Part of Jiangsu Province. Pollution Control Technology 24, 13-15
353	Jiangsu	Irrigation	20					0				Yan Y (2011): The Investigation on the Soil Arsentic Pollution in Irrigation Canal Region in the North Part of Jiangsu Province. Pollution Control Technology 24, 13-16
353	Jiangsu	Irrigation	15					0				Yan Y (2011): The Investigation on the Soil Arsentic Pollution in Irrigation Canal Region in the North Part of Jiangsu Province. Pollution Control Technology 24, 13-17
353	Jiangsu	Irrigation	15					0				Yan Y (2011): The Investigation on the Soil Arsentic Pollution in Irrigation Canal Region in the North Part of Jiangsu Province. Pollution Control Technology 24, 13-18
354	Zhejiang	Remote area	45	8.88889	2.22222		86.6667			0		Chen J, XIang Y (2011): Heavy metal pollution situation investigation and analysis in vegetable base of Taizhou region. Shanghai Agricultural Science and Technology, 19-20
355	Shanxi	Urban	20		0		0	20		0	0	Bo R, Pan W, Wang H (2008): Taiyuan city five pollution-free vegetable base soil heavy metal content in greenhouse research. Shanxi agricultural science 36, 43-46
356	Shaanxi	Urban	85	0	0	0	0	0	0	0	0	Xie W, Pan G, Zhou H, Xie J, Guan C (2011): Access of Heavy Metals Pollution of the Sewage Irrigation Region in Taiyuan,China. Journal of Agro-Environment Science 30, 1553-1560
356	Shaanxi	Remote area	50	0	0	0	0	0	0	0	0	Xie W, Pan G, Zhou H, Xie J, Guan C (2011): Access of Heavy Metals Pollution of the Sewage Irrigation Region in Taiyuan,China. Journal of Agro-Environment Science 30, 1553-1560
357	Shandong	Remote area	110	16	0	0	0	0	21	0	16	Li R, Hao Y, Li G, Jiang Y, Zhang H, Han X (2011): Characteristics and Sources Analysis of Soil Heavy Metal Pollution in Taian City, Shandong, China. Journal of Agro-Environment Science 30, 2012-2017
358	Hebei	Remote area	1470	0	0	0	0	0	0	0	0	Liu N, lEI Y, Zhang S, Cui J, ZHang Y (2011a): Characteristics of fruit growing areas of soil heavy metal spatial variation law research - in cangzhou, hebei province, for example. 土壤通报 42, 736-741
359	Tianjin	Urban	30	3.3	0	0	6.7	0		0	3.3	Wang B, Zhang Z (2012): Tianjin suburban farmland soil heavy metal pollution characteristics and potential ecological risk assessment. China's environmental monitoring 28, 23-27
360	Tianjin	Irrigation	21				28.5714				61.9048	Wang T, Wang J, Sun H, Zhang Y (2012): Comtamination of Cadmium and Mercury in Farmland of Tianjin and Extration Methods for Predicting Their Bioavailability. Journal of Agro-Environment Science 31, 119-124
361	Tianjin	Remote area	20	0	0	0	5	0		0	0	Wang J, Tian S, Feng Y (2006): Survey and Evaluation of Heavy Metal Contamination of Soils in Tianjin. Environmental Science and Technology 29, 72-74
362	Tianjin	Urban	140		0		25	0		0	76	Yu Y 2013: Tianjin suburban leaf vegetables and vegetable soil heavy metal content of investigation and risk assessment. Thesis, Northwest agriculture and forestry university of science and technology
363	Tianjin	Urban	98	6.12316	3.06102	52.2248	90.8173		2.04122	0		Li Z 2006b: Tianjin sewage irrigation area of heavy metal pollution in soil - wheat systems evaluation and correlation analysis, Tianjin Normal University
364	Hubei	Remote area	21	0	0		0	0		0	0	Shen T, Tao Q, Peng W, Li Q (2013a): Accumulative Heavy Metal Features of Soil and Potential Ecological Risk Assessment on Vegetable Base in Tianmen City. Hubei Agricultural Sciences 52, 2016-2020,2037
365	Neimenggu	Irrigation	13	0	0	0	0			0		Tang J, Li H, Cao Z (2007): Investigation and Appraisal of the Heavy Metal Pollution of Sewaged Soil in Tongliao. Chinese Journal of Spectroscopy Laboratory 24, 949-952
365	Neimenggu	Irrigation	13	0	0	0	0			0		Tang J, Li H, Cao Z (2007): Investigation and Appraisal of the Heavy Metal Pollution of Sewaged Soil in Tongliao. Chinese Journal of Spectroscopy Laboratory 24, 949-952
366	Guangxi	Cu	40								97.5	Qiu W, Luo X (2012): Study on Mercury Pollution in Vegetables and Soils in Tongkeng Mining Area and Its Sources Analysis. Environmental Protection Science 38, 33-36
367	Anhui	Coal	36		0		13.8889			0	0	Yu Q, Li X, Wang J (2007): The Investigation and Evaluation of Pb, Cd, Cr, Hg of the Vegetable Soils in North of Anhui Province. Chinese Agricultural Science Bulletin 22, 263-266
368	Sichuan	Remote area	72		0		55	0		0	0	He Y, Zhang C, Xu Z, Ni S, Pan R (2009): Geochemical characterization and evaluation of heavy metal elements in cultivated soil of Wanyuan area. COMPUTING TECHNIQUES FOR GEOPHYSICAL AND GEOCHEMICAL EXPLORATION 31, 277-282
369	Shandong	Remote area	20	0	0	0	0	0	0	0	0	Sheng Q, Ding G, Sheng K (2012): Natural Disaster Characteristics of Forestry and Main Prevention,, Mitigation Measures in Duyun. Journal of Green Science and Technology, 198-200
370	Zhejiang	Remote area	14		0		42.8	0		0	35.7	Liu E, Yang J, Pan X, Wang L (2010): Soil heavy metal content and pollution evaluation in agricultural production base in Wenzhou City. JOURNAL OF ZHEJIANG AGRICULTURAL SCIENCES, 629-632
371	Shanxi		14		0							Zhao L 2011: Magnesium magnesium wenxi county industrial production pollution characteristics of the soil environment, Shanxi university
372	Xinjiang	Urban	50								0	Yu H, Wang L, Qian Y (2012): The Characteristics of Spatial Distribution of Hg Content in the Farm Lands in Midong District of Urumqi City. Journal of Xinjiang Agricultural University 34, 427-430
373	Xinjiang	Urban	103		0		13	0		0	0	Yi Z, Wang L, Qian Y, Sun J (2009): Urumqi farmland soil heavy metal content and evaluation. Resources and environment in arid areas
374	Henan	Urban	13	0	0	0	100	76.9231	0			Han J, Ma J (2004): Sewage irrigation area of heavy metal pollution in soil, wheat systems, migration and accumulation, in kaifeng chemical fertilizer river sewage irrigation area as an example. Ecology and Environment 13, 578-580
375	Beijing	Irrigation	103	0	0	0	0	0	0	0		Wu W, Yin S, Liu H, Pan X, Bao Z (2013): Sewage irrigation area of soil heavy metal spatial structure and distribution. Journal of agricultural engineering 29, 165-173
376	Anhui	Remote area	50	0	0	0	20		0	0		Yao Y 2011: Health risk assessment of heavy metals and soil phytoremediation research of Pollution-free vegetables base. . master Thesis, Anhui Agricultural University
377	Anhui	Urban	82		0	0		75.61	0	0		Wang X, Wang L, Fang F, Huang C (2011a): Pollution Characteristics of Heavy Metals in Vegetable Soil in Sanshan District of Wuhu City. Urban Environment ＆ Urban Ecology 24, 31-33
378	Shandong	Remote area	17		0					0	0	Niu Z, Du Y, Cui B, Wen Q, Liu W, Yang H, Shi Q, Li Y (2006): Studies on residue of heavy metal and chemicals in soils and tobacco leaves. CHINESE TOBACCO SCIENCE 27, 26-28
379	Shaanxi	Urban	10	0	0	10	40	0	0	0	50	Zhang L (2007): The investigation and analysis of soil heavy metal pollution situation in Wei'yang, Xi'an. AGRO-ENVIRONMENT & DEVELOPMENT 24, 103-105
380	Sichuan	Remote area	673	0	32.7448	17.0144						Pang S, Li T, Wang Y, Shen H, Guo Q, Chen D (2010): County farmland soil copper, zinc, chromium content in space mutation characteristics and its influencing factor analysis. China's agricultural science 43, 737-743
381	Hunan	Remote area	219	2.7	8.7	15.1	68.5	13.2	2.7	0		Guo C, Xiao X, Chen T, Liao X, Song J, Wu B (2008): Heavy Metal Pollution of Soils and Vegetables from Midstream and Downstream of Xiangjiang River. ACTA GEOGRAPHICA SINICA 63, 3-11
382	Hunan	Pb/Zn	10				100					Zhu J 2012: Xiangxi flowers through lead and zinc mine of heavy metal contaminated soil ecological restoration research, Agricultural University Of Hunan
382	Hunan	Pb/Zn	10				100					Zhu J 2012: Xiangxi flowers through lead and zinc mine of heavy metal contaminated soil ecological restoration research, Agricultural University Of Hunan
383	Shanxi	Remote area	21	0		0			0	0		Zhang X, Zhang Y, Chen Y, Du J, Ma D, Du J (2013d): Analysis about heavy metal pollution of different kinds of soil in Xiangfen Journal of Shanxi Normal University, 95-97
384	Hubei	remote area	16	0	0	0	0	0	0	0	0	Zhao X (2014): Farmland soil heavy metal pollution survey and evaluation in Xiangyang city. Journal of Green Science and Technology, 207-209
385	Anhui	Remote area	44	0	0		0	0		0	0	Chen J (2007): Situation Survey on Heavy Metal Pollution in Xiao County Green Food Production Regions. JOURNAL OF HEBEI AGRICULTURAL SCIENCES 11, 88-89,91
386	Shandong	Remote area	100	20	0	5	0		0	4		Liu Q, Zang H, Shi Y (2009b): The Pollution Assessment and Spatial Distribution of Soil Heavy Metals in Field Scale --Case Study in Yanggu County of Northwest Shandong Province. Acta Pedologica Sinica, 673-678
387	Shaanxi	Golden ore	113	7.52	12.8	3.01	2.25	0.75		0	43.61	Xu Y, Ke H (2007): Xiaoqinling gold mining area of farmland soil heavy metal pollution evaluation. The soil on 38, 732-736
388	Hubei	Urban	52	0	0		100					Weng T, Wang S (2007): Preliminary study of xiaogan xiaonan soil heavy metal pollution. Agricultural journal of environmental science 26, 39-42
389	Shanxi	Urban	10	0	0	0			10	0		Zhang J, Cheng X, Zhong H (2010a): Integrate Risk Assessment and Species Distribution of Heavy Metals in Sewage-irrigated Soil in Xinfu of Xinzhou. JIANGXI SCIENCE 28
390	Beijing	Urban	19	0	0	0	100					Chen J, Fan W, Sun R, Zhang R Bioavailability and species distribution of heavy metals in sewage-irrigated soil from Xinhe.
391	Beijing	Irrigation	19	0	0	0	100					Chen J, Fan W, Sun R, Zhang R Bioavailability and species distribution of heavy metals in sewage-irrigated soil from Xinhe.
392	Xinjiang	Remote area	161	0	0	0	100	1.2	0	0	88.8	Wang X 2011: Several of the typical xinjiang changji in soil polluted by heavy metal element content distribution and evaluation, Xinjiang agricultural university,
393	Xinjiang	Remote area	913				1.51844	2.42588				Cui H, Sun X, Liu X (2010): Processed tomato in xinjiang origin of soil polluted by heavy metals and pesticide residues. Career and health, 2234-2235
394	Xinjiang	Remote area	67	0	0		1.5	20.9	0	0		Luo Y, Zheng C, Jiang p, Yu Y, Wu H (2012): The risk assessment of soil heavy metals of kuytun land in Xinjiang. Chinese Journal of Soil Science, 1247-1252
395	Xinjiang	Remote area	20	0	0	0	0	0		0	0	Liu Y, Liu H (2007): Sewage irrigation and soil heavy metal pollution prevention and control in Miquan, Xinjiang Journal of Changji University, 45-48
396	Xinjiang		664	0	0		0	0		0	0	Ren L, Jia D, Wang F (2014): Research and assessment on farmland soil heavy metal content in xinjiang. Xinjiang agricultural science 9, 032
397	Xinjiang	Irrigation	381	0	1.84	0	3.41	13.12	4.46	0	0	Zhou Y, Xie C (2012): The xinjiang production and construction corps soil environmental quality research. Environmental engineering, 375-377
398	Xinjiang	Remote area	61	0	0	0	0		4.92	0		Chen M 2006b: Xinjiang spatial variability of soil heavy metals pollution condition and the wastewater irrigation, Xinjiang university
399	Xinjiang	Remote area	32		0		0	0		0	0	Zhang X, Qin J, Wang Q, Li C, Ma Y, Wang Z, Yao G (2014a): Determination and Analysis of Harmful Heavy Metals in Soil of Beef Cattle Farmland in Yili Region. Animal Husbandry and Feed Science 35, 17-20
400	Henan	Urban	8	12.5		100	100		100	0		Li F, Wang X, Tang F (2012): Potential Ecological Risk Assessment of Heavy Metals in the Suburban Farmland Soil from Xinxiang City. Journal of Henan Normal University（Natural Science） 39, 84-87
401	Henan	Battery	8	62.5		100	100		100	0		Zhu G, Zhang C, Wang J, Wang X, Chen D (2009): Investigation of Heavy Metal Pollution in Soil and Wheat Grains in Sewage-irrigated Area in Sizhuangding,Xinxiang City. JOURNAL OF AGRO-ENVIRONMENT SCIENCE 28, 263-268
402	Henan	Battery	8	25		100	100					Zhu G, Su X, Wang X, PAn J (2010): Investigation of the Pollution and Correlation of Heavy Metals in Sewage-irrigated Area in Wangcun, Xinxiang City. JOURNAL OF HENAN NORMAL UNIVERSITY(NATURAL SCIENCE) 38, 102-105
403	Henan	Battery	4	0	0	2.08333	100		100			Wang X, Pi Y, Shi Y, Pi Y (2005): Investigation of the Heavy Metal Situation in Suburban Farmland Irrigated by Battery Waste Water at Xinxiang. JOURNAL OF HENAN NORMAL UNIVERSITY(NATURAL SCIENCE) 33, 95-97
404	Jiangxi	remote area	17								0	Xiong M, Li X, Zhong W (2009): Analysis of Mercury Contention in Soil of Xinyu City. Journal of Henan Agricultural Sciences, 52-55
405	Henan		13	0	0	0	7.69231	0	0	0	16.6667	Lei Z, Xiao R, Hu H, Li C, Wei Y (2013): National highway in xinyang paddy soil heavy metal distribution and evaluation. Hubei province agricultural science 52, 6003-6007
406	Anhui	Coal	70	0	0	0	0	0		28.5714	32.8571	Yuan X, Zhang C (2013): Suzhou city mining area, farmland soil heavy metal content and potential ecological risk assessment. Chinese Journal of Soil Science, 232-235
407	Xinjiang		160		17.5	11.8		13.2	15.4		0	Hai M, Yi M (2014): Yanqi basin, the distribution of surface soil heavy metal source and regional differences. Chinese Journal of Ecology 33, 2789-2795
408	Henan	Coal	13	0	0	100	6.25			76.9231		Du Z, Tao L (2007): In horse around mine coal gangue in the soil heavy metal pollution evaluation Journal of lanzhou jiaotong university (natural science edition) 260, 106-107
409	Jiangsu	Remote area	385	0.25974	0		1.55844	0			0.52	Xu J, Xu Q, Wu J (2005): Investigation on heavy metals content of soil in Yangzhou. Soils and Fertilizers, 12-16
409	Jiangsu	remote area	385	0	0		1.56			0		Xu J, Xu Q, Wu J (2005): Investigation on heavy metals content of soil in Yangzhou. Soils and Fertilizers, 12-16
410	Shanxi	remote area	16		0	0			0		0	Cui X, Ge Y (2009): Investigation and Assessment of Heavy Metal Content in Vegetable Plantations Soil in Yanggao. Journal of Shanxi Agricultural Sciences 37, 55-57
411	Shanxi	remote area	4		0		0	0		0	0	Cui X, Ge Y (2009): Investigation and Assessment of Heavy Metal Content in Vegetable Plantations Soil in Yanggao. Journal of Shanxi Agricultural Sciences 37, 55-57
412	Shanxi	remote area	4									Cui X, Ge Y (2009): Investigation and Assessment of Heavy Metal Content in Vegetable Plantations Soil in Yanggao. Journal of Shanxi Agricultural Sciences 37, 55-57
413	Shanxi	remote area	4									Cui X, Ge Y (2009): Investigation and Assessment of Heavy Metal Content in Vegetable Plantations Soil in Yanggao. Journal of Shanxi Agricultural Sciences 37, 55-57
414	Shaanxi	remote area	18	0	0	0		0	0	0		Wang B 2011: Yangling district different terrace farmland soil properties and environmental quality assessment, Northwest agriculture and forestry university of science and technology
415	Zhejiang	Irrigation	1	0	0	0	0	0	0	0	0	Zhang A, Liu L, Huang C (2011a): Effects of Long-term Irrigation of Livestock Farm Wastewater on Soil Quality and Vegetable Quality in Vegatable Soils. Journal of Soil and Water Conservation 25, 87-91
416	Yunnan	remote area	21					48				Yan X, Liao X, Yu B, Zhang W (2011): Accumulation of Soil Arsenic by Panax notoginseng and Its Associated Health Risk. ENVIRONMENTAL SCIENCE 32, 880-880
417	Sichuan	Remote area	169	0	0	0	53.8462	0	0	0	0	Wang Y, He M, Bai X, Huang B, Yu L (2011b): Soil heavy metal content and evaluation of land consolidation area farmland in TongZi town, Jiangan, Yibin Computing Techniques for Geophysical and Geochemical Exploration 33, 663-668
418	Ningxia	Remote area	6337		0.32		16.12	2.22		0.14	0.32	Li X, Wang H, Gao Y (2013): Soil heavy metal element contents in yinchuan basin and pollution condition analysis. Science and technology information, I0035-I0036
419	Ningxia	Urban	20	0	0		0			0		He J, Zhong Y (2011): Different cultivated fixed number of year of yinchuan facility vegetable soil heavy metal content change research. Beijing agricultural 30, 136-137
420	Sichuan	Remote area	9	0	0	0	11.1111	0		0	0	Zhong H, Zhou Y, Long Q, Tang R (2009): Geological accumulation index evaluation jiangyou city ring rock soil heavy metal pollution. Science and technology in western China 8, 29-30
421	Hebei	Remote area	77	0	0	0	0					Gong D, Ru S, Zhang G, Wang L, Geng A, Sun S (2008): Content of Heavy Metals in Soil and Vegetables from Vegetable Land of Yongnian County. Journal of Hebei Agricultural Sciences 12, 88-90
422	Fujian	Remote area	50							4.2		Bao Y (2009): Yongtai farmland determination of chromium content in the surface soil, and the evaluation of the pollution. FUJIAN CHEMICAL INDUSTRY 5, 067
423	Guizhou	remote area	9		0		11.1111	11.1111		0	0	Wen Y, Chen G, Liu H, Yuan F (2007): Yuqing county mainly pollution-free production base of environmental quality assessment. Guizhou agricultural science 35, 63-65
424	Shandong	Remote area	15		0		0	0			0	Shen J (2010): Yutai wu township soil heavy metal content analysis and evaluation.
425	Guangdong	Pb/zn	7	100	100	100	100					Liu H, Yang Q, Yang H, Li J, Liu D (2012): Characteristics of absorption and accumulation of heavy metals for three dominant plants in Pb-Zn mine tailings eastern Guangdong. Guihaia 32, 743-749
426	Yunnan	Remote area	8	0	0	0	0	0	0	0	0	Chen C, Tang Y, Yang L, Yuan L, Xu Z, KAng P, Yang S (2010a): Study on Pesticide Residue and Heavy Metal Content in GAP Cultivation of Aucklandia lappa Decne in Yunnan. Acta Agriculturae Jiangxi 22, 108-110
427	Yunnan		59	0	0	0	0	0	0	0	0	Shi J, Zhang N (2010): The Distributing Character of Heavy Metals and Its Pollution Estimate in Greenhouse soils of Yunnan Province. JOURNAL OF YUNNAN AGRICULTURAL UNVERSITY 25, 862-867
428	Yunnan	Remote area	5291	14	1.2	2.4	6.8	9.5	12.7	5.1	5.5	Sun Z, Liu M, Hu T (2006): Farmland soil heavy metal content analysis in yunnan province. The national conference on farmland soil pollution monitoring and evaluation technology
429	Yunnan	remote area	51	0	0	0				0		Zhang D, Liu Y, Quan S (2010): Distribution ofHeavy M etalin SoilofHaniTerracein Lvchun County of Yunnan Provinceand Assessmenton ItsPotentialEcological Risk. Southwest China Journal of Agricultural Sciences 23, 23
430	Yunnan	Sn mining	45		0		0	2.22		0	0	Zhang G, Cao Q, Bi S, Zhou X (2013a): Evaluation of Heavy Metal Pollution in Soils from Wastewater Sewage Emitted by A Tin Mine in Yunnan
431	Yunnan	Remote area	19		0			0		0	0	Dai P, An T, Wu B, Zi S, Niu H (2012): Investigations of Heavy Metals and Pesticide Contents in Soils and Vegetables inTonghai County of Yunnan. Journal of Anhui Agricultural Sciences 40, 161-163,170
432	Yunnan	Remote area	19		0			0		0	0	Dai P, An T, Wu B, Zi S, Niu H (2012): Investigations of Heavy Metals and Pesticide Contents in Soils and Vegetables inTonghai County of Yunnan. Journal of Anhui Agricultural Sciences 40, 161-163,170
433	Guangdong	Urban	7		0		0	0		0	0	Wei C, Chen X, Lv Y (2008): Investigation and evaluation of heavy metal content in soil and vegetable in Zengcheng region. Guangdong Agricultural Sciences, 99-100
434	Neimeng	Remote area	20	0	0		5	0		0	0	Liu P 2012: Zhalantun farmland productivity evaluation, Sichuan Agricultural University
435	Guangdong	remote area	106							20.75		Guan H, Wang J, Li P, Wan H, Du J, Zhu Y, Yang G (2008): Concentration of Chromium in Agricultural Soil and Crops and Their Healthy Risk. Environmental Science and Technology, 120-124
436	Jiangsu		20	0	0			0			0	Hu X, Li J, Gang C, Qian W, Wang k, Yu Z (2012): Zhangjiagang city distribution of heavy metals paddy soil ecosystem. JIANGSU AGRICULTURAL SCIENCES 40, 324-327
437	Hunan	Remote area	50	2	0	0	42	4	10	0	6	Li Y, Wu W, Li P, Pan L (2009c): Analysis and Evaluation of Heavy metal Pollution in the Territory of Zhangjiajie City. Environmental Monitoring in China, 107-111
438	Fujian	remote area	96		13.98		7.53	8.42		4.21	12.63	Lai D (2005): Zhangzhou farmland soil heavy metal background values and pollution condition evaluation. Association for the fifth annual seminar to improve channel west bank economic zone in fujian province agricultural comprehensive production capacity at the venue
439	Jilin	Urban	352	0.577169	0.0591968	0.860203	0.651165	1.38557		0.0832455	2.18103	Zhai H 2007: Changchun city distribution of soil heavy metals and soil environmental quality assessment study, Jilin University
440	Jilin	Irrigation	56					0				Wang C, Zhao S, Wu Z (2009): The Investigation and Evaluation of the Soil Arsentic Pollution of West Lake Irrigation District in Changchun City. Environmental Science and Management 34, 180-182
441	Zhejiang	Remote area	157	2.0202	0	2.0202	32.5	0		0	3.82166	Xiao J, Yuan X, Li J (2010): Characteristics of Heavy Metal Pollution in Soil and Rice of Yangtze River Delta Region. Journal of Anhui Agricultural Sciences, 10206-10208
442	Jiangsu	Remote area	86	2.33	0	1.16	2.33	0		0
443	Hunan	Remote area	655	0.62	1.23	3.97	81.68	2.9	3.82	0.61		Long Y, Dai P, Zou H (2008): Changsha, zhuzhou and xiangtan regions of soil heavy metal pollution and assessment. The earth and the environment 36, 231-236
444	Hunan	Remote area	23	13.04	17.39	21.74				0		Ding Z, Chen Z, Li H, Peng X, Feng H, Zhang Y, Lei G, Zhao S (2012): Correlation analysis of the heavy metal total contents and the available contents of agricultural soil in Chang-Zhu-Tan area. Ecology and Environment Sciences, 2002-2006
445	Zhejiang	Remote area	12	0	0	41.7	41.7	0		0	50	Li C, Ji X, Mao H, Zhou W, Wu C (2013): Assessment of soil heavy metal contamination in vegetable bases of Yiwu city. Acta Agriculturae Zhejiangensis 25, 561-566
446	Zhejiang	Remote area	904	3.43	5.35	1.8	10.72	1.04	9.7	3.03	6.8	Cheng J, Shi Z, Zhu Y, Liu C, Li h (2006): Differential Characteristics and Appraisal of Heavy Metals in Agricultural Soils of Zhejiang Province. Journal of Soil and Water Conservation 20, 103-107
447	Zhejiang		174	3	11.5	2.3	17.2	2.9			8	Fu Z, Yu J, Wang F (2013): Zhejiang vegetable base soil heavy metal pollution and potential ecological risk. Environmental science and technology 1
448	Henan	Urban	21	0	0	0	100		0	0		Shen A, Wang Y, Sun S (2009): Content and pollution evaluation of heavy metal from the vegetable bases soil in Zhengzhou. Journal of Gansu Agricultural University 44, 126-131
449			17	0	0	0	11.7647			0		Gao J, Dang H, Zheng M (2013): Zhengzhou suburb farmland soil heavy metal pollution evaluation. China's agriculture notified 29, 116-120
450	Guizhou	Remote area	35	11.1	0		3.7	0		0	0	Wu D, Qin P, Deng Q, Wu K (2011a): Analysis and assessment of heavy metals of soil in pollution free agriculture product bases in Zhijin County. JOURNAL OF GUIZHOU NORMAL UNIVERSITY(NATURAL SCIENCES) 29, 24-27
451	Hebei	Remote area	132		0		0	0			0	Chu Z, Liu W, Xiao Y, Zhu Y, Zheng W, Duan Y (2010): Survey and Assessment of Heavy Metals in Soils and Herbal Medicines from Chinese Herbal Medicine Cultivated Regions.
452	Chongqing	remote area	1772	0.733634	0	0.282167	13.6005	0.112867	3.95034	0.0564334	0.620767	Chen G 2008: Soil heavy metal element migration enrichment of chongqing metropolis circle and the ecological effect research, chengdu university of technology
453	Guizhou	urban	13		0		100					Jin Q, Zeng Q (2014): Boat water bridge for Cd and Pb content in soil, vegetables and corn investigation and risk assessment. Guizhou agricultural science 42, 199N202
454	Zhejiang	Zhougangzhen	36	0	0		0	0		0	0	Cheng G, Lu H, Ye W, Zhao X (2007): Zhou xiang town farmland soil environment quality present situation and evaluation. Anhui agriculture notified 13, 47-48
455	Shaanxi	Remote area	71	0	0	0	0	0	0	0	0	Chen L, Kang K, Yue T, Bai Y, Zhao X, Zou Z (2007): Crested ibis nature reserve of organic agricultural products producing area environmental quality assessment. Shaanxi Journal of Agricultural Sciences, 41-45
456	Guangdong	Remote area	12		0		8.3	8.3		0	16.6	Cui X, Li S, Ding X (2012): The pearl river delta region typical vegetable soil in the study of vegetable distribution characteristics of heavy metals. Journal of ecological environment 21, 130-135
457	Guangdong	Remote area	18		0		33.3	0		0	38.9	Cui X, Li S, Ding X (2012): The pearl river delta region typical vegetable soil in the study of vegetable distribution characteristics of heavy metals. Journal of ecological environment 21, 130-135
457	Guangdong	Remote area	33		0		42.4	0		3	51.5	Cui X, Li S, Ding X (2012): The pearl river delta region typical vegetable soil in the study of vegetable distribution characteristics of heavy metals. Journal of ecological environment 21, 130-135
457	Guangdong	Remote area	42		0		35.7	0		2.4	61.9	Cui X, Li S, Ding X (2012): The pearl river delta region typical vegetable soil in the study of vegetable distribution characteristics of heavy metals. Journal of ecological environment 21, 130-135
458	Guangdong	remote area	114	73.7	0	28.9	88.6		59.6	0		Zhang X, Liu Y (2010a): The pearl river delta enclose tideland farmland soil heavy metal pollution and crops. Agricultural journal of environmental science 29, 80-83
459	Guangzhou	Remote area	232		0		45.26	5.17		1.23	7.76	Hu N, Wen D, Wang F, Sun F, Wang Q, Wan K (2012): Investigation and Analysis of Heavy Metals in Vegetable Producing Soils around Main Industrial Areas in the Pearl River Delta. Chinese Journal of Tropical Agriculture 32, 67-71
460	Hunan	Remote area	18	64.7059	41.1765	82.3529	100	23.5294			88.2353	Sun H, Mao X (2008): The Heavy Metal' s Spatial Variation of Zhuji Lipu Copper Mining Area. Journal of Agro-Environment Science( J. Agro-Environ. Sci.) 27, 2178-2182
461	Zhejiang	Pb/zn	48	100	91.67	100		79.17	68.75	0		Sun H, Mao X (2008): The Heavy Metal' s Spatial Variation of Zhuji Lipu Copper Mining Area. Journal of Agro-Environment Science( J. Agro-Environ. Sci.) 27, 2178-2182
462	Guizhou	Remote area	20		0		30	0		0	0	Chen H, Tan H, Xie F, Xu H, Song Y, He J (2008): DISTRIBUTION AND RISK EVALUATION OF HEAVY METALS IN AGRICULTURAL SOILS OF SOUTHEASTERN ZUNYI CITY, CHINA. JOURNAL OF NUCLEAR AGRICULTURAL SCIENCES 22, 105-110
462	Guizhou	Remote area	22		0		45.5	0		0	13.6	Chen H, Tan H, Xie F, Xu H, Song Y, He J (2008): DISTRIBUTION AND RISK EVALUATION OF HEAVY METALS IN AGRICULTURAL SOILS OF SOUTHEASTERN ZUNYI CITY, CHINA. JOURNAL OF NUCLEAR AGRICULTURAL SCIENCES 22, 105-110
462	Guizhou	Remote area	21		0		52.4	0		0	9.5	Chen H, Tan H, Xie F, Xu H, Song Y, He J (2008): DISTRIBUTION AND RISK EVALUATION OF HEAVY METALS IN AGRICULTURAL SOILS OF SOUTHEASTERN ZUNYI CITY, CHINA. JOURNAL OF NUCLEAR AGRICULTURAL SCIENCES 22, 105-110
462	Guizhou	Remote area	17		0		64.7	0		0	0	Chen H, Tan H, Xie F, Xu H, Song Y, He J (2008): DISTRIBUTION AND RISK EVALUATION OF HEAVY METALS IN AGRICULTURAL SOILS OF SOUTHEASTERN ZUNYI CITY, CHINA. JOURNAL OF NUCLEAR AGRICULTURAL SCIENCES 22, 105-110
463	Liaoning	Remote area	10	0	0	0	0	0	0	0	0
464	Hainan	remote area	8	0	0	0	0					Lin W., Zhang Y (2013)The investigation and assessment of heavy metals in the vegetable soils in the peri-urban area of Wuzhishan. Monitoring and Analysis, 101-102.
465	Shandong	Remote area	102	0	0	5	6	0	0	0	0	Liu P, Zhao H, Liu Z (2010): Outdoor vegetable producing area of shandong province the environmental quality analysis and evaluation of soil heavy metal content. Agricultural journal of environmental science 29, 1130-1136
